## **Ageing, TOR and amino acid restriction: a cross-tissue transcriptional network connects GATA factors to *Drosophila* longevity**

*Adam J Dobson*<sup>1</sup>, *Xiaoli He*<sup>1</sup>, *Eric Blanc*<sup>2</sup>, *Ekin Bolukbasi*<sup>1</sup>, *Yodit Feseha*<sup>1</sup>, *Mingyao Yang*<sup>1,2\*</sup>, *Matthew DW Piper*<sup>1,4\*</sup>

1 - Institute of Healthy Ageing, Department of Genetics, Evolution and Environment, University College London, Gower Street, London WC1E 6BT, UK.

2 - Berlin Institute of Health, Luisenstraße 56, 10117 Berlin, Germany.

3 - Current address: Institute of Animal Genetics and Breeding, Sichuan Agricultural University, Chengdu, Sichuan, China.

4 - Current address: School of Biological Sciences, Monash University, Victoria 3800, Australia.

\* For correspondence: [yangmingyao@sicau.edu.cn](mailto:yangmingyao@sicau.edu.cn), [matthew.piper@monash.edu](mailto:matthew.piper@monash.edu)

Keywords: Ageing, TOR, transcriptional networks, transcription factors, systems biology.

## Abstract

1  
2  
3  
4  
5  
6  
7  
8  
9  
10  
11  
12  
13  
14  
15  
16

Animal lifespan can be extended by dietary restriction (DR), but at a cost to fitness. This phenomenon depends on essential amino acids (EAAs) and TOR signalling, but roles of specific tissues and downstream transcriptional regulators are poorly characterised. Manipulating relevant transcription factors (TFs) specifically in lifespan-limiting tissues may ameliorate ageing without costs of DR. Here we identify TFs which regulate the DR phenotype in *Drosophila*, analysing organs as an interacting system and reducing its transcriptional complexity by two orders of magnitude. Evolutionarily conserved GATA TFs are predicted to regulate the overlapping effects of DR and TOR on organs, and genetic analyses confirmed that these TFs interact with diet to determine lifespan. Importantly, *Srp* knockdown insulated fly lifespan from the pernicious effects of EAAs, but tissue-specific knockdown reduced the corrolary costs. These results provide the first indication that benefits of EAAs for early-life fitness can be decoupled from longevity by tissue-specific transcriptional reprogramming.

## Background

17  
18  
19  
20  
21  
22  
23  
24  
25  
26  
27  
28  
29  
30  
31  
32  
33  
34  
35  
36  
37  
38  
39  
40  
41  
42  
43  
44  
45  
46  
47  
48  
49

How can lifelong health be maximised? Answering this question is a major goal, as ever-increasing human lifespans outpace advances in gerontology, at great social, personal and financial cost <sup>1</sup>. Dietary restriction (DR) has the evolutionarily conserved capacity to improve lifelong health by reducing nutrient intake, but at a cost of reduced biological fitness and vigour in youth <sup>2</sup>. Despite having been discovered 80 years ago <sup>3</sup>, the molecular mechanisms underpinning lifespan extension by DR remain elusive. Defining these mechanisms could ameliorate the burden of ageing without the costs of DR.

Calories do not fully account for the benefits of DR: specific nutrients and their relative ratios are key <sup>4-6</sup>. In *Drosophila*, the ratio of dietary sugar to yeast modulates lifespan, which is explained by essential amino acids (EAAs) from the yeast <sup>7</sup>, and importantly the same mechanism is conserved in mice <sup>8,9</sup>. Recent evidence indicates that the phenotype of EAA-restricted *Drosophila* is recapitulated by pharmacologically suppressing the Target of Rapamycin (TOR) pathway <sup>10,11</sup>, consistent with molecular evidence that EAAs positively regulate TOR <sup>12</sup>. Understanding of how TOR curtails lifespan is incomplete, although maintenance of proteome quality likely plays a role <sup>13-15</sup>. TOR also affects transcription <sup>16-18</sup>, but to date this effect has been relatively poorly studied.

In *Drosophila*, transcriptomic responses to DR and TOR have been characterised at the cellular and organismal levels <sup>18</sup>, but information on tissue-specific and organ-specific transcription is a requisite advance for many reasons. Primarily, an animal's overall phenotype is determined by tissues coordinating to match their collective functions to the environment. Consequently, to fully understand organismal phenotypes we must account for tissues as an interacting and integrated system. By quantifying the changes to that system in low-TOR or DR states, we gain a complete view of how tissues collectively mediate the DR phenotype. Such an understanding is likely to help identify manipulations of regulators of the DR transcriptional state, which may impart longevity even under *ad libitum* feeding. Minimising the number of tissues in which these regulators are manipulated may ameliorate associated costs, if costs and benefits of DR are mediated by distinct tissues. This approach recognises the findings of studies of insulin signalling, which indicate that tissue-restricted manipula-

50 tions are sufficient to extend lifespan, and therefore that transcriptional mechanisms  
51 affecting longevity are incompletely described by organismal analyses<sup>19,20</sup>. Altogeth-  
52 er, these observations suggest that understanding longevity via DR requires (1)  
53 modelling of transcription across systems of interacting tissues, (2) identification of  
54 changes to that system under DR, (3) quantification of the TOR-dependence of these  
55 changes, (4) prediction and testing of tissue-specific regulators of DR-like gene ex-  
56 pression.

57 Recent analytical advances facilitate prediction of transcriptional regulators  
58 from patterns of gene expression. Regulatory elements, such as transcription factors,  
59 can be predicted by enrichment analysis amongst groups of genes<sup>21,22</sup>. Transcrip-  
60 tional network analysis, also known as coexpression analysis, identifies transcripts  
61 which are expressed together<sup>23,24</sup>. The patterns in a transcriptional network therefore  
62 reflect the tendency of genes to be switched on and off together, which can be con-  
63 sidered a reflection of the underlying gene-regulatory machinery. Consequently, tran-  
64 scriptional network analyses provide a strong basis from which to predict regulatory  
65 elements. Network analysis can also answer the need to understand tissues as a  
66 complete system, by identifying how patterns of expression in one tissue which cor-  
67 respond to that in others. Therefore, by defining transcriptional networks across tis-  
68 sues and how they change under DR, we can distill the complex interactions between  
69 transcripts and tissues that define the phenotype of the DR animal, and systematical-  
70 ly reflect the status of the underlying gene-regulatory machinery.

71 Here, we address a key question: By studying transcription across tissues,  
72 can we identify manipulations of transcriptional regulators to recapitulate the DR  
73 phenotype? This study is facilitated by dietary manipulations that offer a precise tool-  
74 set to dissect DR. Previously, we developed a semi-defined *Drosophila* diet, which is  
75 optimal for early-life egg laying, in which 50% of available EAAs are provided as a  
76 supplement to yeast-based medium<sup>7,10</sup>. Against this “fully fed” control, lifespan can  
77 be extended by two interventions, both with correlated fecundity costs to egg laying in  
78 early life: either omission of the EAA supplement (i.e. DR); or the addition of rapamy-  
79 cin (EAA+rapamycin), which extends lifespan in the presence of EAAs by suppress-  
80 ing TOR pharmacologically. These tools allow us to establish the effects of EAA dilu-  
81 tion, and the TOR-dependence of these effects. Taking these diets and capitalising  
82 on orthology between *Drosophila* and vertebrate organs, we studied transcriptomes  
83 in the brain, fat body (the analogue of the vertebrate liver and adipose), gut, ovary

84 and thorax (which largely comprises muscle). We then used transcriptional network  
85 analysis to analyse these tissues integratively, reflecting underlying regulatory ma-  
86 chinery. Promoter analysis was then applied to identify candidate transcription factor  
87 regulators. Crucially, when we tested these transcription factors genetically, we were  
88 able to validate their role as mediators of dietary effects on lifespan, and also demon-  
89 strate that costs of lifespan extension can be mitigated by targeting interventions to  
90 specific tissues.

91

92

## Results

93

94 The effects of DR on ageing are thought to be mediated by the TOR pathway.  
95 Here, by characterising the organ-specific transcriptional changes caused by EAA  
96 restriction (DR) and pharmacological TOR suppression, we isolate changes that are  
97 associated with longevity in both experimental conditions, and address whether the  
98 effects of DR mimic the effects of low TOR. We also associate *cis*-regulatory ele-  
99 ments with these changes, to predict relevant transcription factors. The study design  
100 is presented in Figure 1. We term DR as a diet-induced longevity condition, and ra-  
101 pamycin supplementation as a drug-induced longevity condition.

102

103

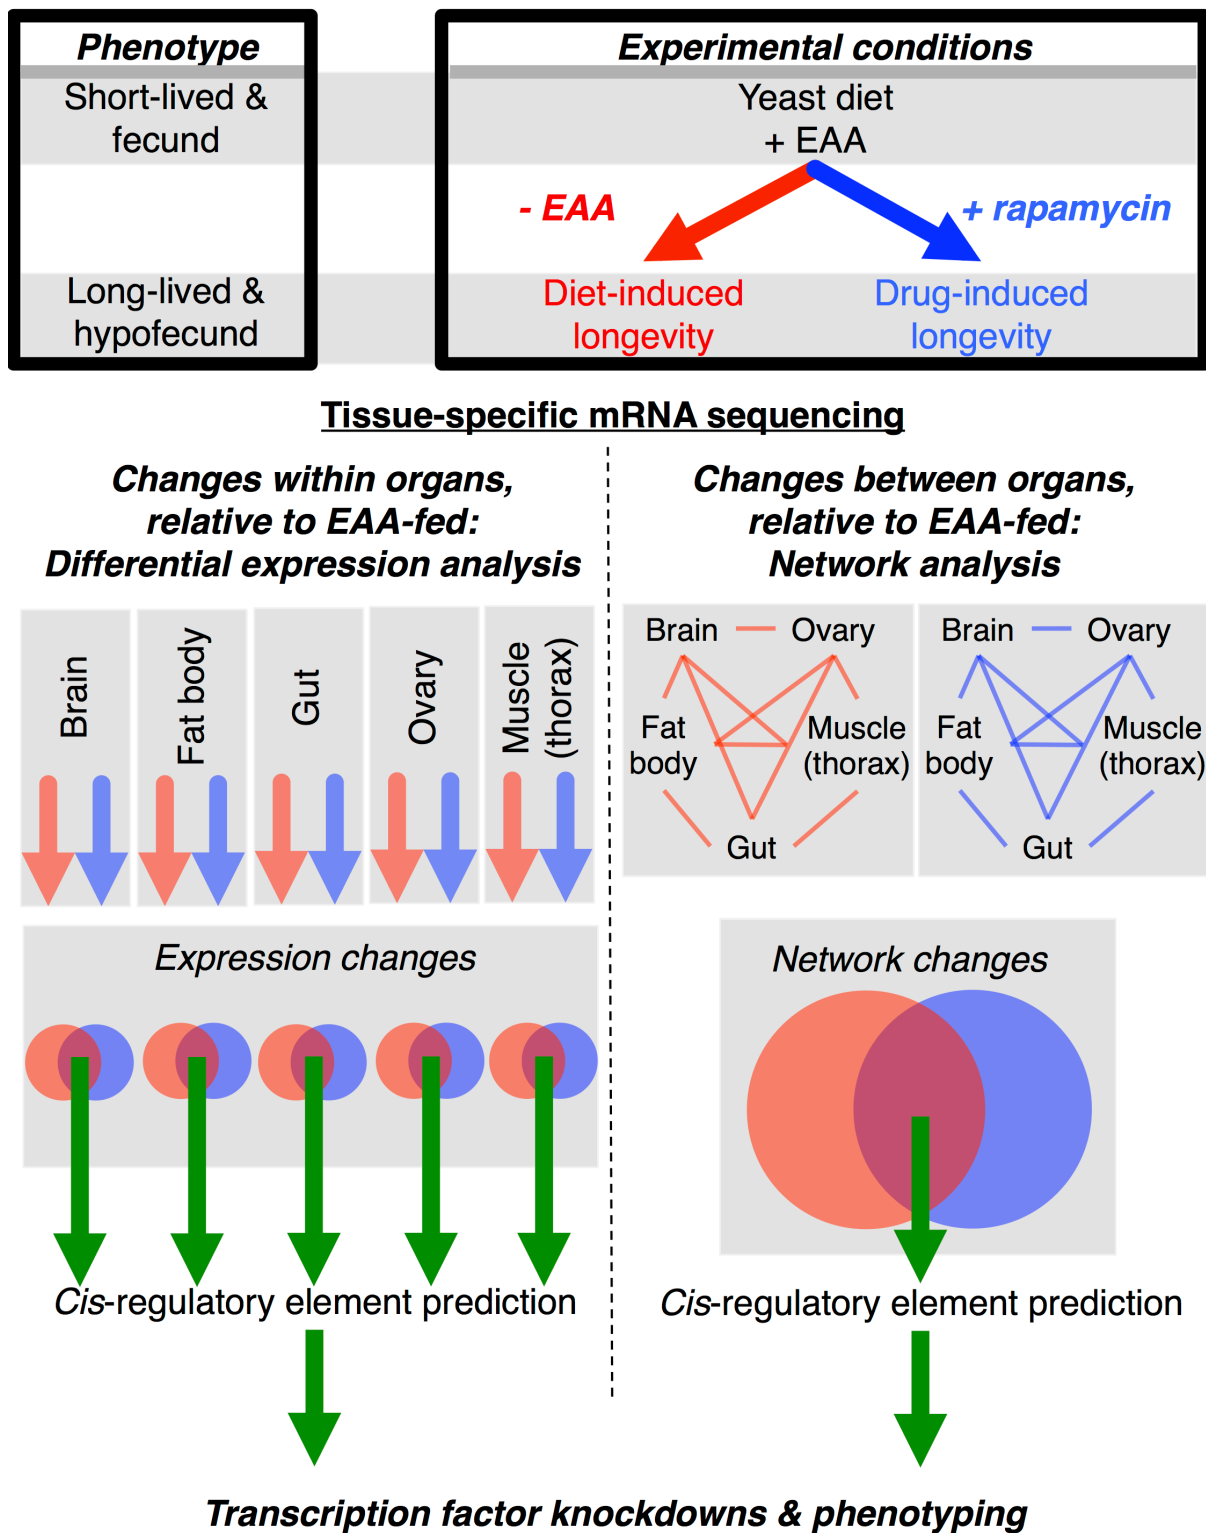

**Figure 1. Study design.** Against a control in which short lifespan is determined by enrichment of essential amino acids (EAAs), lifespan is extended by DR of the EAAs (diet-induced longevity), or pharmacologically, by administration of the TOR-suppressive drug rapamycin (drug-induced longevity). This lifespan extension comes at a biological cost of reduced early-life fitness (i.e. fecundity). Tissue-specific transcriptional changes associated with both conditions are therefore longevity-

associated, EAA-dependent and TOR-dependent. Identifying *Cis*-regulatory elements associated with these transcriptional networks predicts mechanisms by which DR affects transcription via TOR.

104 *Tissue-specific transcriptomic effects of DR are recapitulated by TOR sup-*  
105 *pression*

106 To assess whether the conditions of diet-induced longevity and drug-induced  
107 longevity have equivalent transcriptional effects, we first studied the equivalence of  
108 these treatments within tissues. We compared the changes in expression of all genes  
109 in the transcriptome under these two conditions, with the prediction that the induced  
110 changes would be positively correlated. As predicted, in whole flies, brains, guts, ova-  
111 ries and thoraces, the diet-induced and drug-induced longevity conditions had posi-  
112 tively correlated effects on gene expression (Figure 2). The transcriptional changes  
113 observed in these organs therefore mirror the associated changes to lifespan<sup>10</sup>.  
114 However, the two long-lived conditions did not have equivalent effects in the fat body,  
115 indicating that the coordination of function is largely but not obligately coupled across  
116 organs. To test explicitly the overlapping effects of DR and TOR suppression at the  
117 level of individual transcripts, differential expression analysis was performed. Surpris-  
118 ingly, no genes were differentially expressed in the ovary under DR, despite the ro-  
119 bust decrease in egg laying in this condition<sup>10</sup>. However, in each other tissue, both  
120 lifespan-enhancing treatments had overlapping transcriptional signatures (Table 1).  
121 Overall, these analyses demonstrate that the transcriptional effects of DR largely mir-  
122 ror those of pharmacological TOR suppression.

123



124

Table I. Overlapping effects of the diet-induced longevity (DR) and drug-induced longevity (rapamycin) conditions on changes in gene expression within specific tissues.

| Gene set  |                                | Number of genes <sup>†</sup> |           |         | P-value <sup>§</sup> |
|-----------|--------------------------------|------------------------------|-----------|---------|----------------------|
| Tissue    | Expression change <sup>*</sup> | DR                           | Rapamycin | Overlap |                      |
| Whole fly | Up                             | 254                          | 2239      | 203     | 5.55e-121            |
|           | Down                           | 40                           | 2159      | 17      | 3.99e-06             |
| Brain     | Up                             | 154                          | 22        | 1       | 0.02                 |
|           | Down                           | 439                          | 82        | 63      | 8.44e-82             |
| Fat body  | Up                             | 221                          | 160       | 6       | 0.02                 |
|           | Down                           | 408                          | 156       | 56      | 2.75e-46             |
| Gut       | Up                             | 8                            | 49        | 6       | 7.60e-17             |
|           | Down                           | 72                           | 52        | 6       | 1.78e-08             |
| Ovary     | Up                             | 0                            | 30        | NA      | NA                   |
|           | Down                           | 0                            | 47        | NA      | NA                   |
| Thorax    | Up                             | 141                          | 39        | 10      | 1.32e-13             |
|           | Down                           | 153                          | 25        | 6       | 8.11e-09             |

\* Relative to EAA diet

† Number of genes showing given change in expression

§ Hypergeometric test

125

126

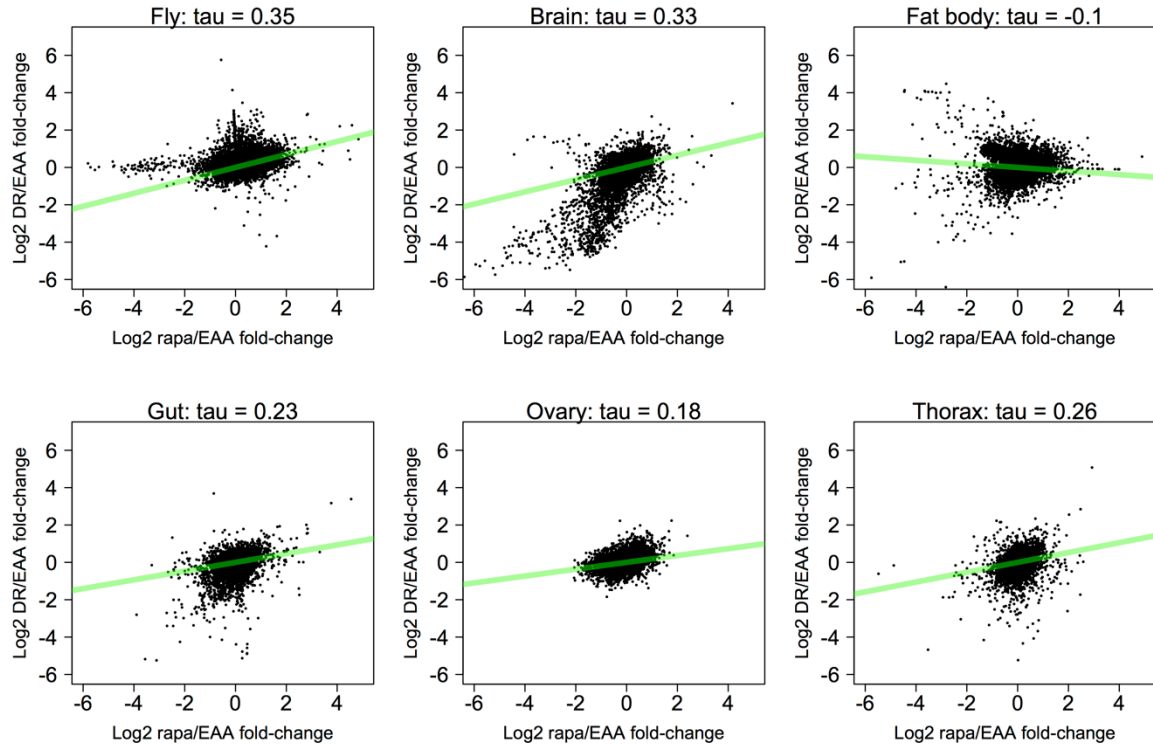

**Figure 2. Changes in expression induced by DR correlate those induced by TOR suppression.** Log<sub>2</sub> fold-changes in expression in the diet-induced longevity and drug-induced longevity conditions, relative to the EAA-enriched control (DR/EAA fold-change and rapa/EAA fold-change, respectively), were calculated for every gene in the transcriptome. Fold-changes were calculated by DESeq2. Text above panels indicates correlations (Kendall's Tau) between fold-changes induced by the two long-lived conditions. All p-values <  $2.2e^{-16}$

127 To look for ubiquitous molecular signatures of lifespan extension, we exam-  
128 ined overlaps between the transcriptional changes observed between different tis-  
129 sues. Surprisingly, no one transcript responded to DR/TOR in all organs, and the  
130 whole-fly samples captured only a small portion of the organ-specific changes asso-  
131 ciated with lifespan extension (Figure S1). Therefore, DR cannot be understood in  
132 terms of any one tissue. To address whether this was functionally relevant, we ana-  
133 lysed enrichment of GO terms amongst the transcripts associated with longevity.  
134 Most GO terms (83%) were associated with specific organs, showing that there is al-  
135 so no ubiquitous functional signature of DR/TOR (Figure S2). Together these anal-  
136 yses show that the DR regulon can largely be accounted for by TOR (excepting the  
137 ovary), but that the identity of the responsive transcripts is tissue-dependent. The or-  
138 gan-specificity of longevity-associated changes indicates parallel responses amongst  
139 organs to EAAs and rapamycin, suggesting the coordination of organ-specific func-  
140 tions changes under DR and low systemic TOR.

141

### 142 *Diet and TOR suppression have overlapping effects on the orchestration of* 143 *expression across organs*

144 Discrete tissues compartmentalise functions, and an individual's fitness de-  
145 pends on correctly orchestrating these tissue-specific functions to match the nutri-  
146 tional environment. It is therefore possible that the lifespan benefits of DR and TOR  
147 suppression may be mediated by certain tissues, and the biological costs by others.  
148 Therefore we investigated how DR changes the orchestration of gene expression  
149 across organs, studied as an integrated system. To identify interdependent gene ex-  
150 pression (i.e. gene coexpression) amongst organs, we employed Weighted Gene  
151 Coexpression Network Analysis (WGCNA; <sup>23</sup>). This approach can identify codepend-  
152 ent gene expression and reduce dimensionality of complex data: therefore, applying  
153 it in our study allowed us to identify codependent gene expression across organs,  
154 and changes in those codependencies in the long-lived conditions. After applying  
155 quality controls and removing genes with zero variance, 11164 of 13442 analysed  
156 genes clustered into 14 modules (Figure 3a, Figure 3b, Supplementary Materials),  
157 representing groups of genes that share expression patterns across organs. By de-  
158 scribing modularity in our data, this network provides a complete description of the  
159 structure of the transcriptome across all organs and diets under study.

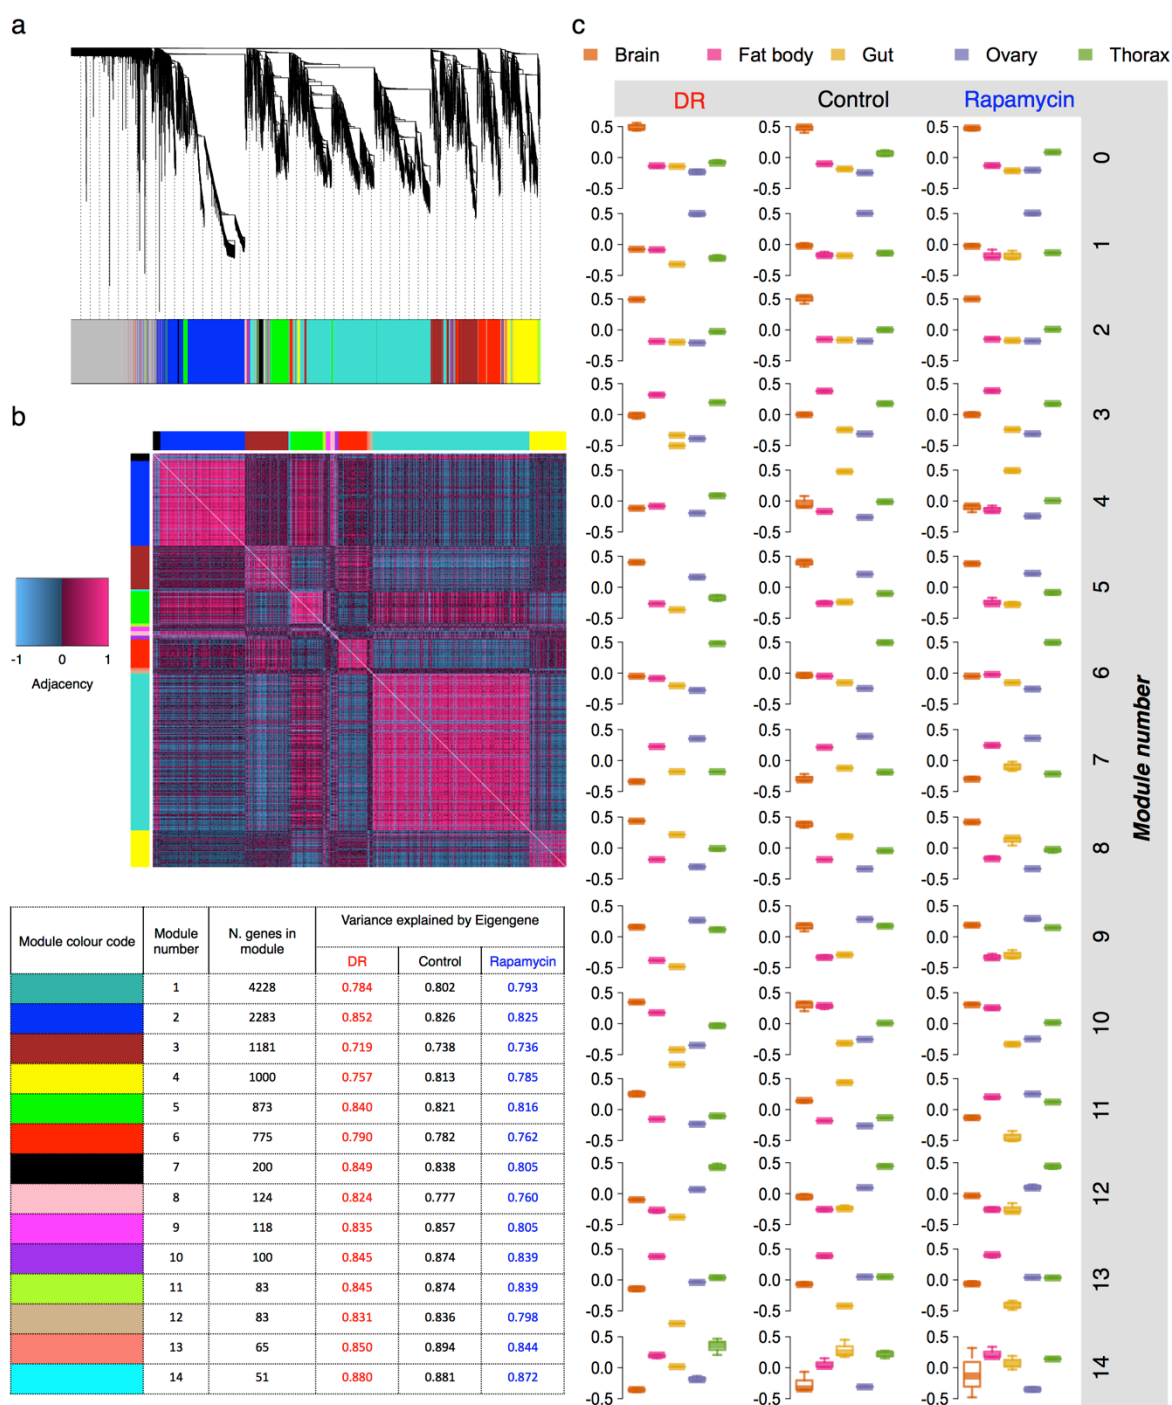

**Figure 3. A network description of transcription across *Drosophila* organs and long-lived conditions. (a)** Consensus transcriptional modules found across organs in all three experimental conditions. Genes were clustered according to their expression ( $\log_2$  RPKM) across organs by Weighted Gene Coexpression Network Analysis (WGCNA), revealing modules of genes showing similar coexpression across organs. Leaves of the tree indicate genes. The tree was cut by hybrid tree cutting to define transcriptional modules (clusters). Tree cutting assigned genes to one of 14 consensus transcriptional modules, indicated by colour-coded vertical lines that together form the horizontal bar beneath the dendrogram (see Supplementary Spreadsheets

for assignments of genes to modules). Genes not assigned to any module are colour-coded grey. **(b)** Module assignments identify clear structure in the transcriptional network, using the EAA-fed control as an example. Modules are indicated by coloured side bars. The heatmap indicates gene-gene adjacency (i.e. signed squared correlations) in expression. **(c)** Representative expression (Eigengenes) of all modules (y-axis showing Eigengene values, A.U.). These data summarise changes in transcriptional networks across organs and experimental conditions. Data are plotted by experimental condition in columns (“DR” = diet-induced longevity, “Rapamycin” = drug-induced longevity, short-lived control = “EAA”), and transcriptional module in rows. Within each plot, boxes are colour-coded by tissue (see key). Boxplots show medians (horizontal midline), 1st and 3rd quartiles (hinges), and range of data points.

160 We built on the transcriptional network analysis to isolate significant changes  
161 in network structure in the two long-lived conditions, by identifying pairs of modules  
162 exhibiting significantly changed coregulation. Quantifying module coregulation re-  
163 quired reduction of the complexity of the data. Therefore, we summarised gene ex-  
164 pression in each module with a single "Eigengene" vector per module (Figure 3c),  
165 calculated as the first principal component of expression of the genes in each module  
166 <sup>25</sup>. These Eigengenes accounted for between 72% and 89% of the variance in each  
167 module (weighted average = 79.86%, Figure 3b), thus simplifying the description of  
168 the organ system by two orders of magnitude, from  $11.1e^3$  transcripts to 14  
169 Eigengenes, whilst retaining ~80% of total information. We then used these  
170 Eigengenes to quantify changes in module-module coregulation. For all pairs of  
171 Eigengenes, correlations were calculated in each dietary condition then, for each  
172 long-lived condition, the correlation coefficients were subtracted from the correspond-  
173 ing coefficient in the EAA-fed control. This quantified changes in module-module  
174 coregulation induced in the two long-lived conditions. Repeating the same procedure  
175 on random permutations of the data generated null distributions for each pair of mod-  
176 ules. Pairs of modules which showed significantly altered coregulation were identified  
177 by comparing the observed changes in correlation coefficients to the null distribu-  
178 tions. This analysis thereby systematically identified pairs of modules whose coregu-  
179 lation was significantly altered by the conditions causing longer life (Figure 4). The  
180 diet-induced longevity condition significantly changed the coregulation of three pairs  
181 of modules (4 & 13, 4 & 3, 14 & 13). All significant changes in the drug-induced lon-  
182 gevity condition were paired with module 11 (relative to modules 1, 4, 7, 8, 9, 12, 13).  
183 This correlation-permutation approach identified changes in coregulation of pairs of  
184 modules, but did not reveal whether those changes were driven by one or both mem-  
185 bers of each pair. Therefore, by three separate methods, we asked which individual  
186 modules' Eigengenes were most strongly perturbed across the experimental condi-  
187 tions (Figure S3). These three analyses identified modules 4, 11 and 14, which were  
188 all identified by the correlation-permutation analysis. Therefore, the Eigengene anal-  
189 yses collectively indicated that altered regulation of modules 4, 11 and 14 changes  
190 the coordination of functions across organs in the long-lived conditions. Module 11  
191 was associated specifically with drug-induced longevity, module 14 was associated  
192 specifically with diet-induced longevity, and module 4 was associated with both diet-  
193 induced and drug-induced longevity. These results indicate that the coexpression of

194 module 4 with other modules may be associated generally with longevity by TOR  
195 suppression, whilst modules 11 and 14 exhibit intervention-specific changes in coex-  
196 pression.  
197

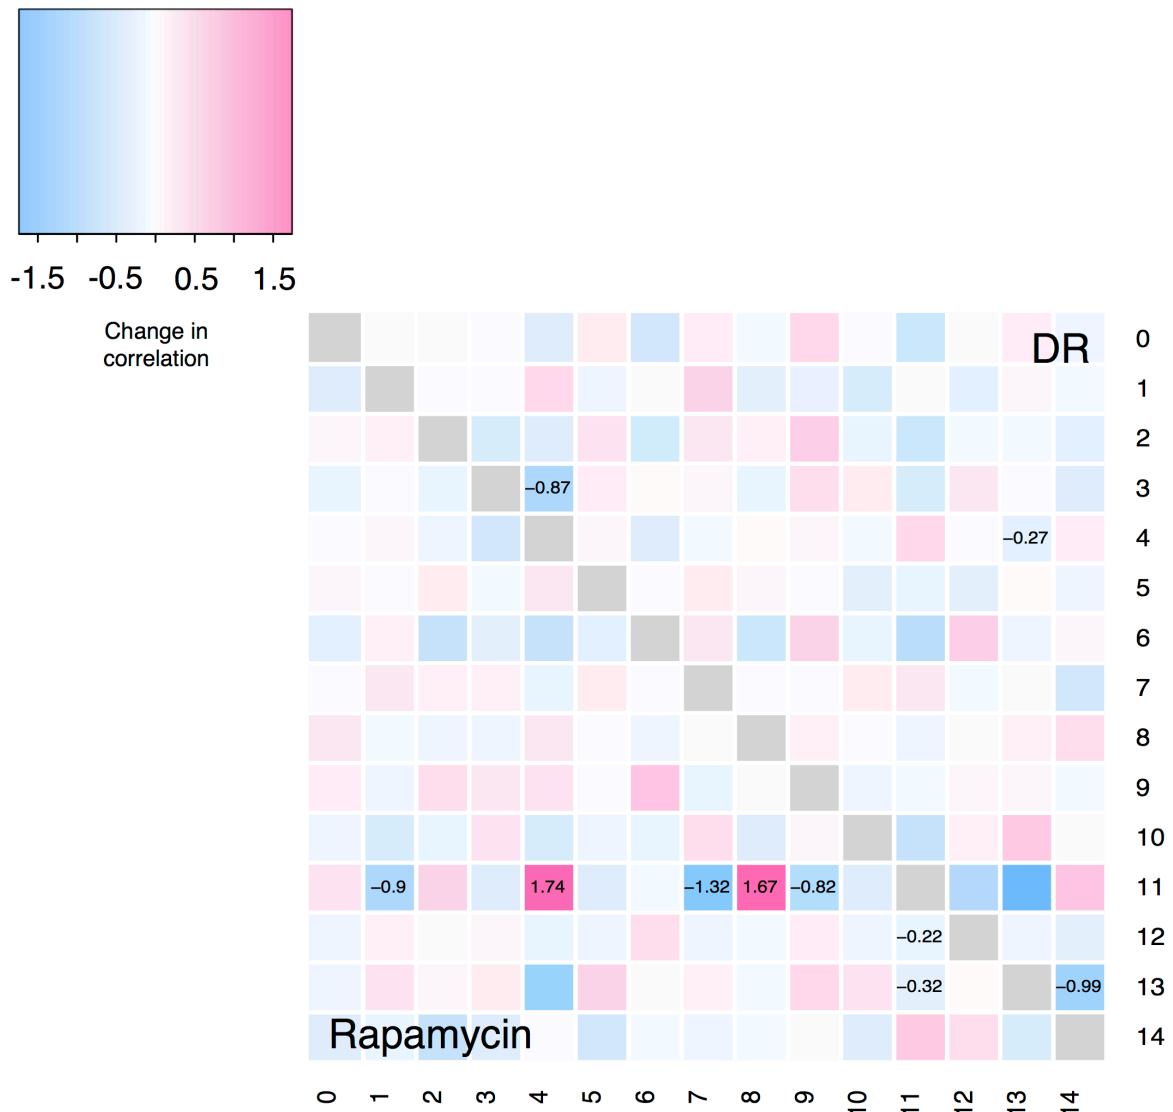

**Figure 4. Structure of longevity-associated changes in the transcriptional network.** The heatmap shows the observed change in correlation (Spearman's rho) between pairs of modules in response to DR and in response to TOR suppression (Rapamycin), relative to the fully EAA-fed condition. Row and column labels represent transcriptional modules. Values indicate the difference in correlation between the given condition and the EAA-fed condition, and are given when the change was significant ( $p \leq 0.05$ ) according to permutation testing.



198 To identify functions that are likely affected by changes to coexpression  
199 across organs, we analysed enrichment of Gene Ontology (GO) terms within each  
200 module (Supplementary Materials). Distinct transcriptional modules were associated  
201 with non-overlapping functions, indicating that these modules represent functionally  
202 distinct suites of genes, and therefore changes to their coexpression is likely physio-  
203 logically relevant. Of the modules implicated in responses to DR, Module 4 was en-  
204 riched in extracellular metabolic enzymes - particularly peptidases - and also lipases  
205 and carbohydrases. Module 14 was enriched in transmembrane sugar transporters  
206 and polysaccharide/carbohydrate binding. Module 11 was enriched in ATP-binding  
207 cassette (ABC) transporter activity. Taken together, the transcriptional network and  
208 GO analyses suggest that longevity is associated with altered orchestration of meta-  
209 bolic functions across organs, and not changes to the same metabolic program in all  
210 tissues.

211  
212 *Predicting transcription factors to regulate longevity-associated transcriptional*  
213 *changes*

214 We sought to identify candidate regulators of transcriptional changes associ-  
215 ated with diet-induced longevity and drug-induced longevity. We predict that manipu-  
216 lating transcription factors (TFs) that regulate DR/TOR-dependent transcriptional  
217 regulation will mimic DR by correctly coordinating diverse transcriptional targets. We  
218 identified transcription factor binding site motifs (TFBSs) associated with transcrip-  
219 tional variation across organs in the long-lived conditions. This process associated  
220 each transcriptional module with a potentially unique set of TFs, but clustering mod-  
221 ules by these TF sets grouped modules 4, 11 and 14 (Figure 5a), which the transcrip-  
222 tional network analyses had implicated in longevity. This clustering therefore sug-  
223 gested that these longevity-associated modules share common upstream regulators.  
224 Indeed, the sets of TFs identified in the longevity-associated modules overlapped  
225 substantially (Figure 5b), and these shared motifs were also the most significantly  
226 enriched; for each longevity-associated module, the most strongly enriched motifs  
227 bind GATA family TFs (*GATA $\delta$* , *GATA $\delta$* , *grn*, *pnr*, *srp*) (Table II). Furthermore, the  
228 most significant association observed in the entire analysis was between GATA-  
229 binding motifs and Module 4, the only module associated with both diet-induced and  
230 drug-induced longevity. Other motifs associated with all three longevity-associated  
231 modules were annotated with *Bx* - which physically binds the GATA TF *pnr*, *Ham*,

232 which has roles in cell fate determination <sup>26,27</sup>; and *CG10348*, which has no known  
233 regulatory function. However, the association with these latter three transcription fac-  
234 tors was less significant than the association with GATA factors. Looking across all  
235 modules, all but 2 and 5 were associated with some GATA motifs, however, the  
236 strength of enrichment (Escore) for the GATA factors was significantly greater for the  
237 longevity-associated modules 14 and 4 (Figure 5c). The final evidence of association  
238 between GATA factors and longevity-associated modules was that Module 4 was not  
239 only highly enriched in GATA binding sites, but also contained GATAe (Supplemen-  
240 tary Files). Experimental studies have shown correlated expression of a TF and its  
241 putative targets is a strong predictor of causal relationships <sup>21,22</sup>. Altogether, these  
242 findings strongly implicated GATA factors in the tissue-specific transcriptional chang-  
243 es observed under low TOR.  
244

Table II. Annotations for top five-ranked motifs enriched in association with transcriptional modules. Unannotated motifs are excluded.

| Longevity-associated              | Module number | TF*                     | Escore <sup>†</sup> |
|-----------------------------------|---------------|-------------------------|---------------------|
| Diet-induced<br>&<br>Drug-induced | 4             | grn srp pnr GATAd GATAe | 11.58               |
|                                   |               | grn srp pnr GATAd GATAe | 11.21               |
|                                   |               | grn srp pnr GATAd GATAe | 10.07               |
|                                   |               | grn srp pnr GATAd GATAe | 10.07               |
|                                   |               | grn srp pnr GATAd GATAe | 10.07               |
| Drug-induced                      | 11            | grn srp pnr GATAd GATAe | 5.95                |
|                                   |               | grn srp pnr GATAd GATAe | 5.88                |
|                                   |               | CG10348 ham             | 5.68                |
|                                   |               | grn srp pnr GATAd GATAe | 5.56                |
|                                   |               | CG10348 ham             | 5.56                |
| Diet-induced                      | 14            | grn GATAd pnr GATAe     | 10.63               |
|                                   |               | grn srp pnr GATAd GATAe | 9.67                |
|                                   |               | grn GATAd pnr GATAe     | 9.05                |
|                                   |               | grn srp pnr GATAd GATAe | 8.69                |
|                                   |               | grn GATAd pnr GATAe     | 8.60                |
| No                                | 1             | Dref                    | 8.50                |
|                                   |               | Dref                    | 7.28                |
|                                   |               | Dref                    | 5.66                |
|                                   |               | crp                     | 4.78                |
|                                   |               | CG7928                  | 4.47                |
| No                                | 2             | lola                    | 4.57                |
|                                   |               | lola                    | 4.44                |
|                                   |               | Trl                     | 4.43                |
|                                   |               | Trl                     | 4.43                |
|                                   |               | Trl                     | 4.42                |
| No                                | 3             | grh                     | 7.30                |
|                                   |               | grh                     | 6.64                |
|                                   |               | GATAe srp pnr GATAd     | 6.24                |
|                                   |               | grn srp pnr GATAd GATAe | 5.91                |
|                                   |               | grn srp pnr GATAd GATAe | 5.91                |
| No                                | 5             | CG9906 CG1924 Cnx99A    | 4.94                |
|                                   |               | jim                     | 4.21                |
|                                   |               | nerfin-1 nerfin-2       | 4.01                |
|                                   |               | slp1 slp2 foxo fd19B    | 3.88                |
|                                   |               | Dref                    | 3.87                |
| No                                | 6             | vri                     | 6.88                |
|                                   |               | gt                      | 5.73                |
|                                   |               | Mef2                    | 5.54                |
|                                   |               | Mef2                    | 5.43                |
|                                   |               | vri                     | 5.18                |
| No                                | 7             | crp                     | 5.08                |
|                                   |               | pnr                     | 3.82                |
|                                   |               | HLH106                  | 3.80                |
|                                   |               | CrebB-17A               | 3.61                |
|                                   |               | Hnf4                    | 3.43                |
| No                                | 8             | CG10348 ham             | 5.63                |
|                                   |               | CG10348 ham             | 5.44                |
|                                   |               | scrt                    | 5.35                |
|                                   |               | scrt                    | 5.00                |
|                                   |               | CG12605                 | 4.91                |
| No                                | 9             | crp                     | 6.92                |
|                                   |               | Trl                     | 5.44                |
|                                   |               | Trl                     | 5.44                |
|                                   |               | Trl                     | 4.96                |
|                                   |               | Trl CG33260             | 4.68                |
|                                   |               | Atf6                    | 5.60                |
|                                   |               | grn GATAd pnr GATAe     | 4.37                |

|    |    |                     |      |
|----|----|---------------------|------|
| No | 10 | CG11071             | 4.35 |
|    |    | grn GATAd pnr GATAe | 4.34 |
|    |    | srp                 | 4.31 |
|    |    | crp                 | 9.27 |
| No | 12 | CG6792              | 6.20 |
|    |    | kay Atf3            | 5.58 |
|    |    | Dref                | 4.91 |
|    |    | vri                 | 4.74 |
| No | 13 | HLH106              | 8.86 |
|    |    | HLH106              | 7.99 |
|    |    | GATAd               | 6.58 |
|    |    | srp                 | 6.50 |
|    |    | GATAe               | 6.37 |

245 \* Genes annotated as associated with the motif

246 † Escore for the motif

247

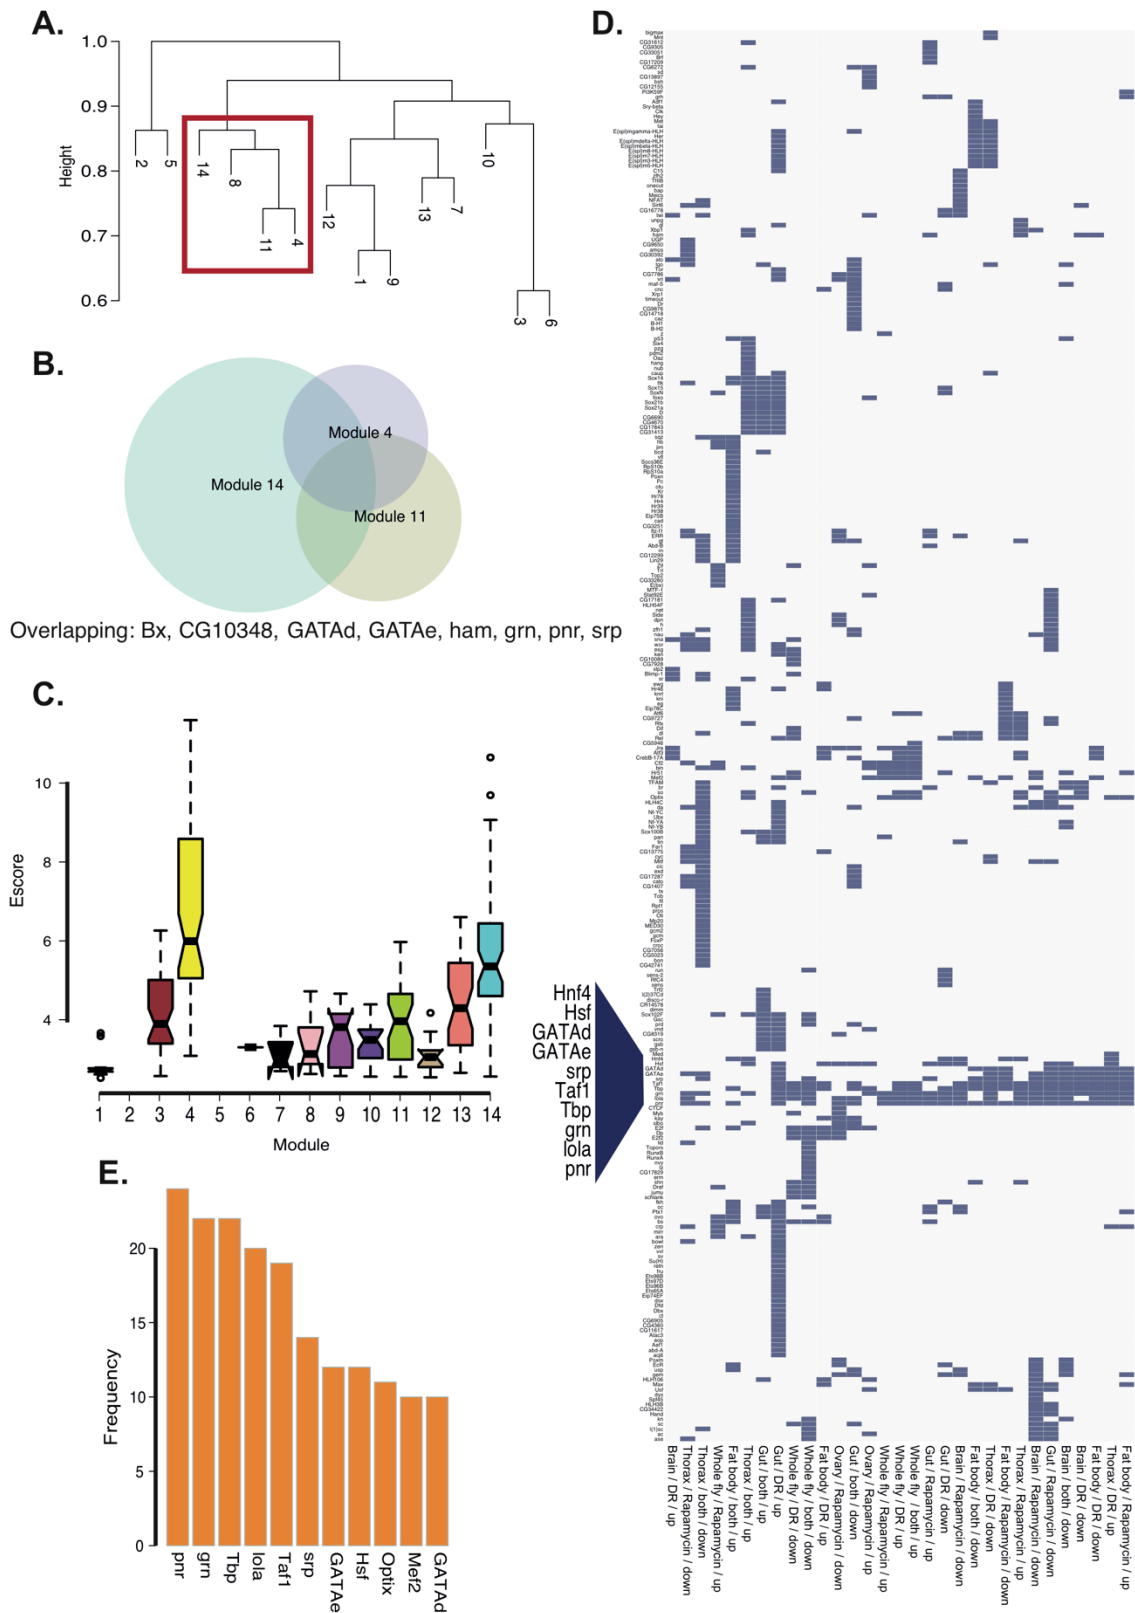

**Figure 5. A signature of GATA transcription factors as regulators of the transcriptional response to DR and/or TOR. (a)** Lifespan-associated transcriptional modules are grouped by sharing of transcription factor binding site motifs. Each module was tested for enrichment of *cis*-regulatory elements, and clustered by the

presence/absence of associated transcription factor binding site motifs. Dendrogram labels represent module numbers. This analysis clusters together transcriptional modules associated with longevity (4, 11, 14, also clustered with module 8). **(b)** Longevity-associated modules are associated with overlapping sets of transcription factor binding sites. Text below the Venn diagram names the transcription factors associated with binding sites enriched in all three longevity-associated modules. **(c)** Distribution per module of enrichment (Escore) of motifs annotated as binding GATA transcription factors. The box plots show medians (horizontal midline), 1st and 3rd quartiles (hinges), and range of data points. The notches equate to ~95% confidence intervals for the medians  $[(1.58 * \text{interquartile range}) / (\text{square root } n)]$ . The plot shows that enrichment of GATA binding sites is particularly strong for modules 4 and 14, both of which are associated with lifespan extension by DR. **(d)** GATA factor binding sites are enriched across multiple gene sets regulated by DR/TOR. Columns represent sets of genes according to tissue and the sign of expression change per treatment. Rows represent TFs associated with the sets of differentially expressed genes by enrichment of binding site motifs in the gene set. The axes are ordered by clustering the presence (blue) and absence (grey) of TF binding sites, using binary distance. Names of transcription factors occurring in a cluster across multiple gene sets have been magnified. **(e)** The bar plot shows the frequency of associations with longevity-associated transcriptional changes within organs, for the most frequently associated TFs. TFs associated with <10 gene sets are excluded.

248           To complement the analysis of transcriptional network regulators, we repeated  
249 the same approach on sets of genes which showed changed regulation (differential  
250 expression) within organs in one or both of the long-lived conditions (Table III). Con-  
251 sistent with the absence of an organ-nonspecific transcriptional signature of DR/TOR,  
252 most TFBSs identified by this analysis were associated with specific tissues. Howev-  
253 er, one cluster of TFs was associated with multiple gene sets across organs, and that  
254 cluster contained the GATA factors (Figure 5d). Across all gene sets, each GATA  
255 factor was associated with at least 32% of diet/tissue-specific gene sets (Figure 5e).  
256 GATA factors were therefore associated with DR/TOR-dependent transcriptional  
257 changess within organs, recapitulating the parallel observations across organs.  
258

259

Table III. Annotations for top five ranked motifs enriched in association with differentially expressed gene sets. Unannotated motifs are excluded.

| Tissue    | Gene set |            | TFs**       | Escore <sup>†</sup> |
|-----------|----------|------------|-------------|---------------------|
|           | DR*      | Rapamycin* |             |                     |
| Whole fly | -        | -          | Tbp,Taf1    | 11.11               |
|           |          |            | E2f,E2f2,Dp | 10.22               |
|           |          |            | Tbp         | 8.98                |
|           |          |            | E2f,E2f2,Dp | 8.17                |
|           |          |            | E2f,E2f2,Dp | 7.96                |
| Whole fly | +        | +          | Cf2         | 6.25                |
|           |          |            | Mef2        | 5.41                |
|           |          |            | bin         | 5.40                |
|           |          |            | Cf2         | 5.37                |
|           |          |            | Cf2         | 5.22                |
| Whole fly | -        |            | E2f,E2f2,Dp | 6.55                |
|           |          |            | Tbp,Taf1    | 6.44                |
|           |          |            | lola        | 6.27                |
|           |          |            | Blimp-1     | 5.98                |
|           |          |            | Blimp-1     | 5.98                |
| Whole fly | +        |            | Cf2         | 5.84                |
|           |          |            | Mef2        | 5.23                |
|           |          |            | Mef2        | 5.22                |
|           |          |            | Optix       | 5.19                |
|           |          |            | bin         | 5.07                |
| Whole fly |          | -          | Top2        | 4.32                |
|           |          |            | Dref        | 4.05                |
|           |          |            | Trl,CG33260 | 3.93                |
|           |          |            | Dref        | 3.92                |
|           |          |            | Dref        | 3.87                |
| Whole fly |          | +          | lola        | 8.29                |
|           |          |            | lola        | 8.27                |
|           |          |            | lola        | 7.61                |
|           |          |            | Optix       | 4.70                |
|           |          |            | bin         | 4.45                |
| Brain     | -        | -          | Tbp         | 8.40                |
|           |          |            | Tbp,Taf1    | 8.35                |
|           |          |            | grn,pnr     | 6.85                |
|           |          |            | pnr         | 6.21                |
|           |          |            | lola        | 6.13                |
| Brain     | -        |            | pnr         | 11.03               |
|           |          |            | grn         | 10.04               |
|           |          |            | ham         | 10.01               |
|           |          |            | grn,pnr     | 9.95                |
|           |          |            | pnr         | 9.55                |
| Brain     | +        |            | Jra         | 4.31                |
|           |          |            | Jra         | 4.29                |
|           |          |            | Atf3        | 4.02                |
|           |          |            | sna         | 3.77                |
|           |          |            | ato         | 3.68                |
| Brain     |          | -          | Tbp,Taf1    | 9.58                |
|           |          |            | Tbp         | 7.63                |
|           |          |            | srp         | 5.33                |
|           |          |            | lola        | 5.02                |
|           |          |            | grn,pnr     | 4.76                |
|           |          |            | Tbp         | 8.07                |
|           |          |            | Tbp,Taf1    | 7.42                |



|          |   |   |              |       |
|----------|---|---|--------------|-------|
| Brain    |   | + | gem          | 4.89  |
|          |   |   | pnr          | 4.63  |
|          |   |   | tin          | 4.57  |
| Fat body | - | - | Rel          | 8.75  |
|          |   |   | Rel          | 7.10  |
|          |   |   | Tbp          | 6.94  |
|          |   |   | pnr          | 5.50  |
|          |   |   | Tbp,Taf1     | 4.99  |
| Fat body | + | + | hb           | 6.89  |
|          |   |   | hb           | 6.34  |
|          |   |   | sqz,rn,Lin29 | 5.90  |
|          |   |   | hb           | 5.83  |
|          |   |   | sqz,rn,Lin29 | 5.70  |
| Fat body | - |   | pnr          | 5.45  |
|          |   |   | grn          | 5.34  |
|          |   |   | pnr          | 4.85  |
|          |   |   | grn          | 4.77  |
|          |   |   | GATAe        | 4.65  |
| Fat body | + |   | Hsf          | 6.54  |
|          |   |   | Hsf          | 5.75  |
|          |   |   | Hsf          | 5.10  |
|          |   |   | ovo          | 4.77  |
|          |   |   | bs           | 4.49  |
| Fat body |   | - | GATAd        | 6.61  |
|          |   |   | srp          | 5.77  |
|          |   |   | pnr          | 5.53  |
|          |   |   | GATAe        | 5.46  |
|          |   |   | Tbp          | 5.38  |
| Fat body |   | + | lola         | 6.46  |
|          |   |   | grn          | 6.45  |
|          |   |   | lola         | 6.15  |
|          |   |   | grn          | 5.87  |
|          |   |   | pnr          | 5.62  |
| Gut      | - | - | cic          | 10.44 |
|          |   |   | Tbp          | 8.89  |
|          |   |   | Tor          | 7.88  |
|          |   |   | Tbp,Taf1     | 6.90  |
|          |   |   | Tbp          | 6.81  |
| Gut      | + | + | scro         | 13.34 |
|          |   |   | oc           | 12.11 |
|          |   |   | scro         | 10.44 |
|          |   |   | ttk          | 10.16 |
|          |   |   | vnd          | 9.38  |
| Gut      | - |   | gem          | 6.79  |
|          |   |   | grn          | 6.49  |
|          |   |   | pnr          | 6.37  |
|          |   |   | pnr          | 5.53  |
|          |   |   | grn,pnr      | 4.92  |
| Gut      | + |   | oc           | 8.97  |
|          |   |   | fru          | 7.82  |
|          |   |   | scro         | 7.61  |
|          |   |   | fru          | 7.51  |
|          |   |   | ken          | 7.28  |
| Gut      |   | - | zfh1         | 8.56  |
|          |   |   | Tbp,Taf1     | 8.19  |
|          |   |   | da           | 8.18  |
|          |   |   | Tbp          | 7.93  |

|        |   |   |             |       |
|--------|---|---|-------------|-------|
|        |   |   | da          | 7.41  |
| Gut    | + |   | Hsf         | 4.58  |
|        |   |   | pnr         | 4.46  |
|        |   |   | ERR         | 4.11  |
|        |   |   | br          | 3.77  |
|        |   |   | grh         | 3.71  |
| Ovary  | - |   | E2f,E2f2,Dp | 4.56  |
|        |   |   | Myb         | 4.55  |
|        |   |   | Myb         | 4.46  |
|        |   |   | vri         | 4.41  |
|        |   |   | vri         | 4.26  |
| Ovary  | + |   | twi         | 5.19  |
|        |   |   | HLH106      | 4.18  |
|        |   |   | CG13897     | 3.89  |
|        |   |   | bin         | 3.87  |
|        |   |   | foxo        | 3.81  |
| Thorax | - | - | grn         | 9.63  |
|        |   |   | grn         | 8.02  |
|        |   |   | pnr         | 7.72  |
|        |   |   | pnr         | 7.71  |
|        |   |   | pnr         | 7.63  |
| Thorax | + | + | zfh1        | 6.02  |
|        |   |   | sna         | 5.55  |
|        |   |   | sna         | 5.41  |
|        |   |   | ham         | 5.32  |
|        |   |   | Rfx         | 4.24  |
| Thorax | - |   | Tbp         | 9.37  |
|        |   |   | grn,pnr     | 9.02  |
|        |   |   | Tbp,Taf1    | 8.47  |
|        |   |   | GATAd       | 7.43  |
|        |   |   | GATAe       | 7.07  |
| Thorax | + |   | Tbp,Taf1    | 10.54 |
|        |   |   | Tbp         | 8.63  |
|        |   |   | lola        | 7.43  |
|        |   |   | grn         | 6.99  |
|        |   |   | Hnf4        | 6.86  |
| Thorax | - |   | ttk         | 7.43  |
|        |   |   | crp         | 7.19  |
|        |   |   | ttk         | 6.93  |
|        |   |   | Fer1        | 6.46  |
|        |   |   | ase         | 6.34  |
| Thorax | + |   | Rel         | 7.19  |
|        |   |   | Tbp,Taf1    | 7.02  |
|        |   |   | Tbp         | 6.95  |
|        |   |   | Rel         | 5.03  |
|        |   |   | Rfx         | 4.68  |

\* sign of expression change, relative to EAA diet. The gene set is defined by only the effect of one treatment when only one symbol is given.

\*\* Genes annotated as associated with the motif

† Score for the motif

261

262         The TFBS enrichment analysis associated GATA factors both with transcrip-  
263         tional changes within organs and altered functions of the organs as a collective  
264         whole. This association was consistent with prior knowledge of the evolutionarily  
265         conserved biology of these TFs. GATA factors play known roles in signalling amino  
266         acid availability via TOR in evolutionarily diverse eukaryotes (e.g. yeast: <sup>28</sup>; and mos-  
267         quitos: <sup>29</sup>), as well as being required for lifespan extension by some tissue-specific  
268         genetic lesions in worms <sup>20</sup>. To test for evolutionarily conserved connections between  
269         GATA factors and DR-responsive transcripts, we established the association be-  
270         tween TFBSs and orthologs of DR-responsive genes across 12 *Drosophila* species.  
271         These 12 *Drosophila* species span ~40 of million years of evolution, which due to  
272         their rapid development time, equates to a greater evolutionary time than that for the  
273         mammalian radiation. The method used for this analysis was independent of that  
274         used for *D. melanogaster*, but also showed that the association between GATA mo-  
275         tifs and orthologs of DR-responsive genes from *D. melanogaster* was robust across  
276         *Drosophila* species (Supplementary Spreadsheets). Together, these data and previ-  
277         ous findings strongly implicate GATA factors as evolutionarily-conserved regulators  
278         of tissue-specific transcriptional responses to EAAs.

279

### 280 *Functional roles for GATA factors in mediating dietary effects on lifespan*

281         Of the five *D. melanogaster* GATA TFs, *GATAe* and *srp* were of particular inte-  
282         rest for a role in longevity via DR/TOR. *GATAe* was associated more strongly than  
283         any other TF with longevity-associated transcriptional changes (see above), and *srp*  
284         has known roles in the fat body in regulating oogenesis via yolk proteins <sup>30</sup>. Conse-  
285         quently we focussed on testing the roles of *srp* and *GATAe* in dietary regulation of  
286         longevity. We knocked down *srp* and *GATAe* with tissue-specific RNAi, and evaluat-  
287         ed whether these knockdowns altered the effects of dietary EAAs on egg laying and  
288         lifespan. *GATAe* and *srp* were most highly expressed in the gut and fat body, respec-  
289         tively (Figure S4), so we targeted *GATAe* in the midgut epithelium (with the TiGS  
290         driver: <sup>31</sup>) and *srp* in the fat body (with the S<sub>1</sub>106 driver, which drives in both fat body  
291         and gut <sup>32</sup>, however fat body-specific expression of *srp* (Supplementary Materials)  
292         suggests that RNAi phenotypes can be attributed solely to the fat body). These  
293         GeneSwitch drivers <sup>33</sup> are activated by feeding flies the RU<sub>486</sub> inducer (RU).

294

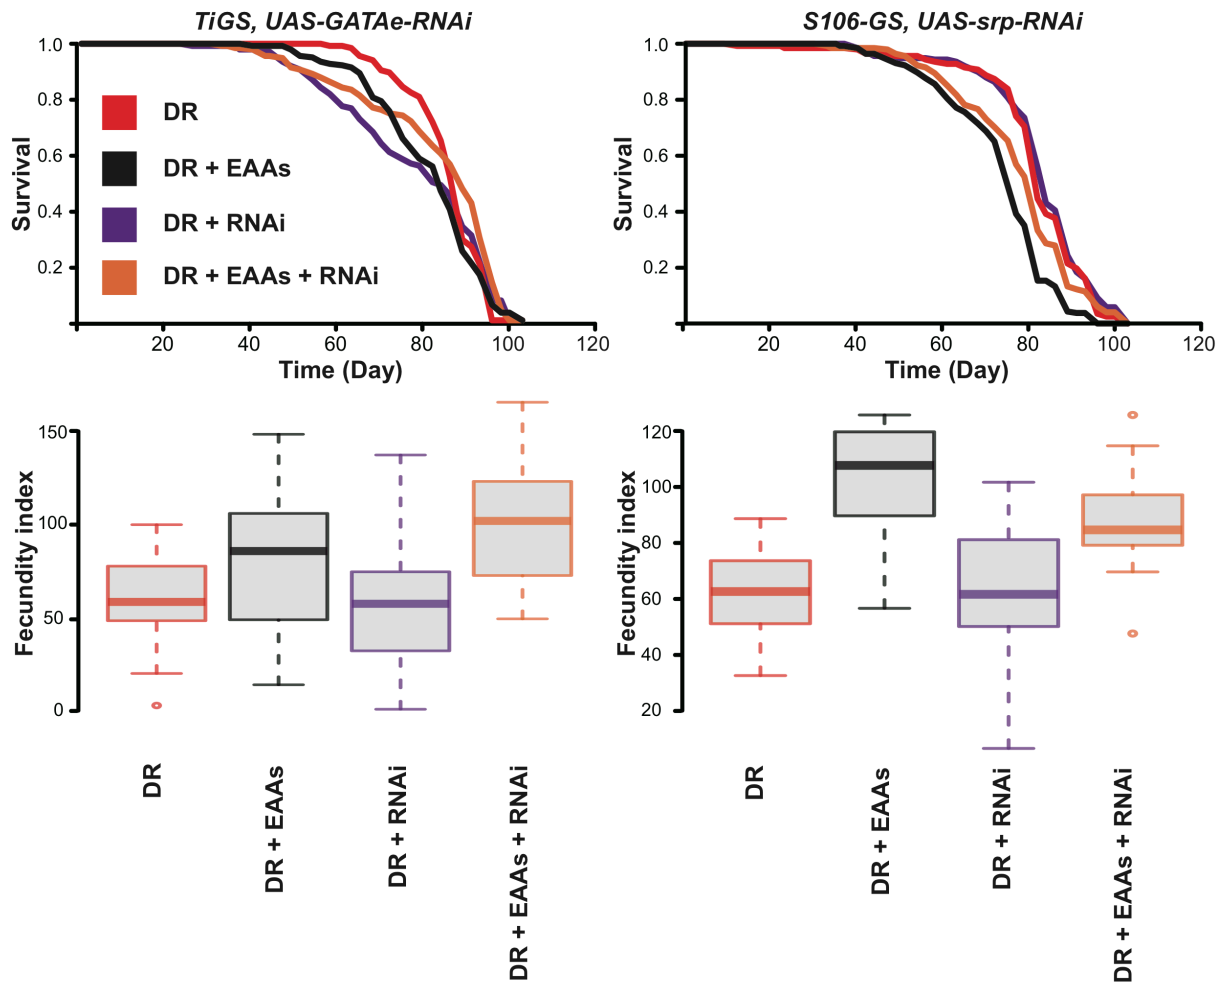

**Figure 6. Tissue-restricted knockdown of *GATAe* and *srp* interact with dietary EAAs to determine egg laying and lifespan.** Survival curves (A & C) and egg laying indices (overnight egg laying by vials of 10 flies; B & D) of flies expressing *GATAe<sup>RNAi</sup>* in the gut (A, B), or *srp<sup>RNAi</sup>* in the gut and fat body.

295

296           In *GATAe*<sup>RNAi</sup> flies there was a significant interaction between the effect of  
297 feeding the transgene-inducing drug and EAA on the lifespan of *GATAe* knockdown  
298 flies (Cox Proportional Hazards Regression,  $P < 0.005$ ). Specifically, knocking down  
299 *GATAe* in the gut accelerated the onset of mortality in early life but, surprisingly, this  
300 lifespan shortening was partially rescued by feeding dietary EAAs (Figure 6a). How-  
301 ever *GATAe*<sup>RNAi</sup> affected neither egg laying nor altered the effect of EAAs on egg lay-  
302 ing (Figure 6b), indicating that the regulation of egg laying is independent of the  
303 lifespan-limiting process induced by knocking down *GATAe* in the gut.

304

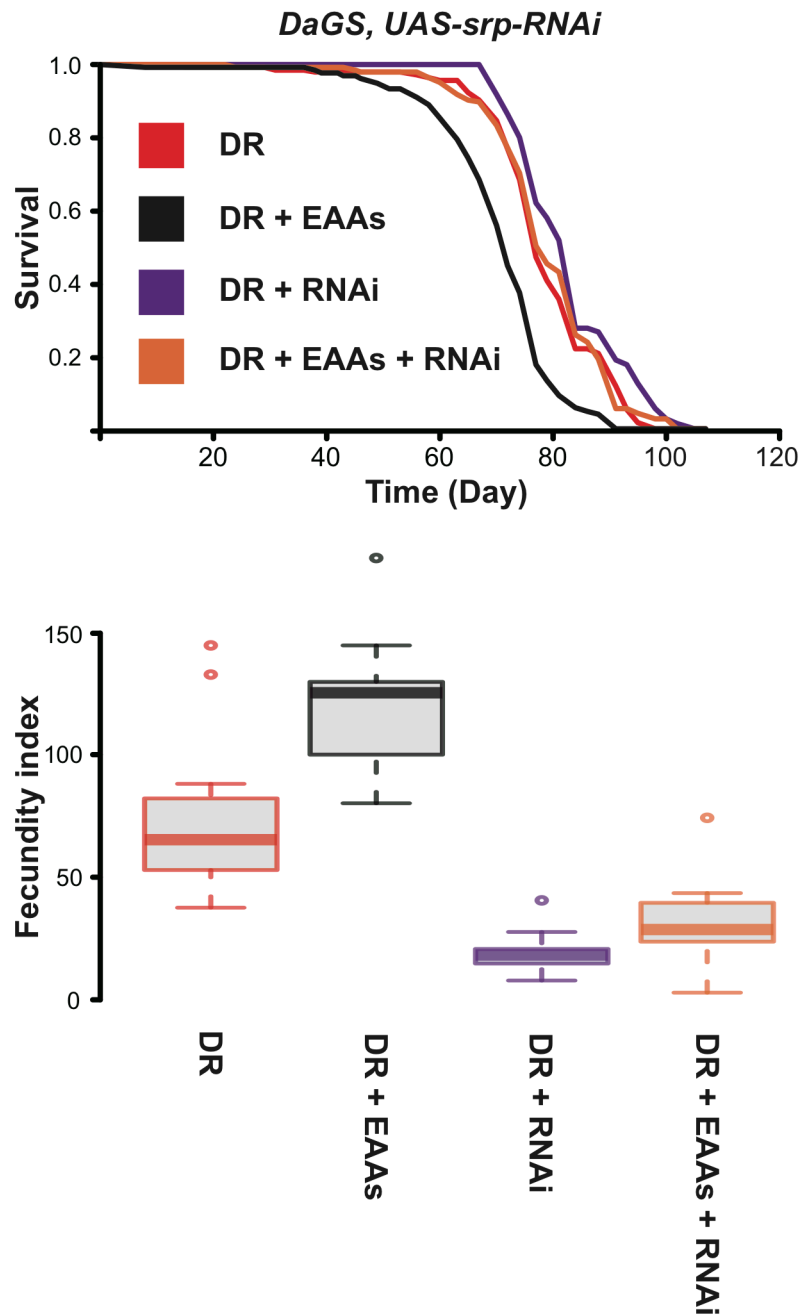

**Figure 7. Ubiquitous knockdown of *srp* reverses lifespan-shortening effects of EAAs and desensitises egg laying to EAAs. (A) Survival curves and (B) egg laying indices of flies ubiquitously expressing RNAi against *srp*.**

305

306 In contrast to *GATAe* knockdown, *srp* knockdown had positive effects on lon-  
307 gevity (Figure 6c). Fat body-specific expression of *srp*<sup>RNAi</sup> protected flies from the  
308 lifespan-shortening effects of EAAs (log-rank test,  $p < 0.001$ ), but there was no effect  
309 on lifespan in the absence of EAAs ( $p = 0.57$ ). Egg laying was not affected by *srp*  
310 knockdown ( $p = 0.08$ ). Therefore, knocking down *srp* in the fat body insulates lifespan  
311 against the pernicious effects of EAAs, but does not preclude flies from the early-life  
312 benefits of EAA feeding for egg laying. Together, the *GATAe*<sup>RNAi</sup> and *srp*<sup>RNAi</sup> experi-  
313 ments validate our bioinformatic analysis, by linking age-dependent physiology with  
314 interactions between dietary EAAs and the tissue-specific regulation of GATA factors.

315 Our expression data showed that *srp* is expressed most strongly in the fat  
316 body, but is also expressed in other tissues e.g. the ovary. Therefore, we asked  
317 whether systemic *srp* knockdown using a *Daughterless* GeneSwitch driver further al-  
318 tered fly phenotype. Ubiquitous knockdown of *srp* was sufficient to neutralise the  
319 lifespan-shortening effects of EAAs, restoring lifespan to that of flies fed DR food  
320 (Figure 7a). Furthermore, ubiquitous *srp* RNAi extended lifespan of flies on DR food,  
321 meaning that transgene expression resulted in a median 7 day lifespan extension  
322 whether or not the flies were fed high levels of dietary EAAs. Whilst systemic *srp*  
323 knockdown extended lifespan more strongly than the tissue-specific knockdown, the  
324 tradeoff with egg laying was much greater (Figure 7b). Without induction of *srp*<sup>RNAi</sup>,  
325 the flies laid ~25% more eggs when EAAs were supplemented to the food, but *srp*  
326 knockdown arrested egg laying (ANOVA,  $p < 2.2 \cdot 10^{-16}$ ) and rendered it insensitive to  
327 EAA feeding (EAA \* RU interaction,  $p < 0.005$ ). The egg laying phenotype thus con-  
328 trasted the lifespan phenotype, since egg laying was entirely desensitised to diet,  
329 whereas median lifespan remained sensitive. Together, these data indicate that the  
330 relationship between lifespan and egg laying is set by an interaction of dietary EAAs  
331 and *srp*, and the integration of egg laying and lifespan depends on the tissues in  
332 which this interaction occurs.

333

334

## Discussion

335

336 Dietary restriction improves lifelong health and extends lifespan in a range of  
337 organisms, from yeast to mammals. A growing body of evidence shows the particular

338 importance of dietary nutrient balance for ageing, particularly lowered pro-  
339 tein:carbohydrate ratio <sup>6,34</sup>, which implicates amino-acid sensitive TOR signalling <sup>11</sup>.  
340 This implicit role of TOR was recently validated in *Drosophila*, by the demonstration  
341 that active TOR is required for EAA enrichment to shorten lifespan <sup>10</sup>. These results  
342 have the important implication that the lifespan effects of EAA restriction are not ac-  
343 counted for solely by metabolic effects, but also by cellular signalling. Using the same  
344 experimental conditions, our present study predicts lifespan-relevant and EAA-  
345 dependent signalling mechanisms, by showing that EAA restriction has transcription-  
346 al effects which are congruent - both within and between organs - with those of  
347 pharmacological TOR suppression, indicating that the transcriptional effects of DR  
348 are indeed mediated in large part by TOR. Furthermore, these overlapping transcrip-  
349 tional changes are also associated with overlapping sets of *cis* regulatory elements.  
350 Thus, DR and rapamycin have overlapping effects on lifespan, on transcription within  
351 organs, on the coordination of functions across organs, and their transcriptional tar-  
352 gets share predicted regulators.

353 Our results connect lifespan regulation by DR and low TOR with GATA tran-  
354 scription factors. The GATA factor knockdown experiments validate the bioinformatic  
355 connections between dietary EAAs, transcription factors and lifelong physiology.  
356 Specifically, these experiments show that genetic knockdown of either *GATAe* or *srp*  
357 substantially alters the effect of diet on fly survival and, in the case of *srp*, knockdown  
358 both extended lifespan and dictated the influence of diet on egg laying, thus pheno-  
359 copying flies treated with rapamycin. Curiously, *GATAe* knockdown in the gut  
360 changed the sign of the effect of EAAs on lifespan, suggesting either a different opti-  
361 mal dietary balance in these flies, or that elevated EAAs rescued the pathological ef-  
362 fects of GATA knockdown. By contrast, *srp* knockdown with two different drivers can-  
363 celled the lifespan-shortening effects of EAA enrichment. Furthermore the GATA  
364 knockdown experiments show that, whilst lifespan and egg laying normally show  
365 coupled responses to diet, they can be decoupled by genetic manipulation of GATA  
366 factors, depending on which tissues are targeted. The phenotypic differences be-  
367 tween flies in which *srp* is locally or systemically knocked down provide key evidence  
368 that tissue-targeted manipulation of TFs associated with DR can recapitulate the  
369 lifespan benefits of DR, and that the associated costs depend on the tissue-  
370 specificity of the intervention. This supports the notion that ageing can be ameliorated  
371 by specifically targeting pathologies in lifespan-limiting tissues. Whilst there is some



372 existing evidence of a role for GATA factors in lifespan regulation <sup>20</sup>, to our  
373 knowledge they have not yet been associated explicitly with DR, nor has there been  
374 a prior demonstration of any transcriptional intervention blocking the phenotypic ef-  
375 fects of EAAs. The indication that costs and benefits of dietary alteration are mediat-  
376 ed by distinct tissues has the important biomedical implication that lifelong health  
377 may be improved by altering the coordination of function across multiple tissues, and  
378 the evolutionary implication that phenotypic tradeoffs evolve due to coupled functions  
379 of tissues.

380         The GATA factors are an ancient family of transcription factors, which have  
381 well-characterised and essential roles in coordinating development and growth in or-  
382 ganisms from yeast to mice. In multicellular differentiated organisms, GATA factors  
383 are required in the development of multiple tissue types, which in *Drosophila* includes  
384 the heart <sup>35</sup>, fat body <sup>36</sup> and gut <sup>37</sup>. GATA factors are also expressed tissue-  
385 specifically in adulthood (Figure S4), but their roles in coordinating adult functions are  
386 not well characterised. In *Drosophila*, recent studies have shown a role of *GATAe* in  
387 maintenance of cell identity and tissue function in the adult gut, but it is not yet clear  
388 from which molecular pathways *GATAe* integrates information <sup>38-40</sup>. One of the bet-  
389 ter-described roles for GATA factors in adult animals is in nutrient regulation of oo-  
390 genesis in mosquitos <sup>29,41-43</sup>. In *Aedes aegypti*, oogenesis requires a blood meal,  
391 which contains the mosquito's only source of protein. Egg production is suppressed  
392 before feeding, due in part to GATA-mediated repression in the fat body of the major  
393 yolk precursor protein gene *Vg* <sup>44</sup>. After the blood meal, *Vg* expression is activated by  
394 TOR enhancing expression of the transcriptional activator *AaGATAa* <sup>43</sup>. In *Drosophi-*  
395 *la*, there is evidence that this regulatory circuit may be conserved, since *srp* regulates  
396 expression of yolk proteins <sup>30</sup>. Our new and recent data show that rapamycin abro-  
397 gates higher egg laying caused by EAA enrichment <sup>10</sup>, corresponding to changes in  
398 the fat body in expression of yolk proteins (Supplementary Materials). The connection  
399 in *Drosophila* between dietary nitrogen and GATA transcriptional control is consistent  
400 with mechanisms in the yeast *Saccharomyces cerevisiae*, in which selective amino  
401 acid catabolism is controlled by a circuit known as Nitrogen Catabolite Repression. In  
402 this system, when the available nitrogen sources only support poor growth, TOR-  
403 dependent nuclear localisation of a GATA transcription factor triggers the expression  
404 of genes involved in the transport and metabolism of less-preferred nitrogen sources

405 <sup>28</sup>. Together, these data point to highly evolutionarily conserved connections between  
406 protein uptake, growth and reproduction, TOR signaling and transcriptional control by  
407 GATA factors. Theory suggests that ageing results from antagonistic pleiotropic ef-  
408 fects of mechanisms that promote growth and reproduction in the young <sup>45</sup>. GATA  
409 factors fit these criteria, as nutrient-responsive regulators of growth that we associate  
410 with molecular responses to lifespan-extending regimes. Due to the evolutionarily  
411 conserved connections between dietary nitrogen and lifespan on one hand, and die-  
412 tary nitrogen and GATA factor-regulated transcription on the other, we anticipate new  
413 interest in the role that GATA factors play in lifespan regulation.

414 Our experiments demonstrate that the tissue-restricted knockdown of GATA  
415 factors is sufficient to modify the lifespan-shortening effect of EAAs. Previous studies  
416 have shown that tissue-targeted interventions to lower insulin signalling are sufficient  
417 to extend lifespan in worms and flies <sup>46</sup>, and GATA factors are required for some  
418 such effects. It is well-established that the balance of dietary nutrients has the evolu-  
419 tionarily conserved capacity to determine lifelong health <sup>11</sup>, and to recognise this bal-  
420 anced supply, insulin and TOR signalling must coordinate. Reducing either insulin or  
421 TOR signalling is sufficient to extend lifespan, suggesting that the lifespan-extending  
422 effects of these two interventions may be mediated by the nexus of their signalling  
423 effects. In *C. elegans*, the GATA factor *ELT-2* is required for longevity following die-  
424 tary restriction or mutation of the insulin receptor <sup>20</sup>, and GATA factor overexpression  
425 extends lifespan <sup>47</sup>. Additionally, previous transcriptional studies in both flies and  
426 worms have uncovered enrichment of GATA motifs in the insulin regulon <sup>48,49</sup>. To-  
427 gether with our data, these results suggest that signals from TOR and other nutrient  
428 sensing pathways are mediated at least in part by GATA factors. In light of these da-  
429 ta, our demonstration that transcriptional effects of diet are largely tissue-specific  
430 suggests that TOR and the GATA factors mediate cell-autonomous interpretations of  
431 global signals (e.g. insulins or bioamines), into a local language that dictates physio-  
432 logical change appropriate to the tissue in question.

433 Transcription factors known to be downstream of TOR signalling and insulin  
434 signalling are candidates for interpretation by GATA factors in *Drosophila*. *REPTOR*  
435 and *REPTOR-BP* have recently been discovered by Tiebe and colleagues as a novel  
436 TOR-dependent transcription factor complex <sup>18</sup>. Given the complementary nature of  
437 Tiebe *et al*'s cell culture experiments and our study of dissected tissues, an emergent

438 hypothesis is that GATA factors determine organ-specific responses to TOR by modi-  
439 fying effects of systemic *REPTOR* signalling. Downstream of insulin signalling, mo-  
440 lecular interactions between *FoxO* and TOR signalling are already established: TOR  
441 lies in a network of interacting signaling pathways including insulin <sup>50</sup>, and *FoxO* is  
442 required for reduced insulin signalling to extend lifespan <sup>51</sup>. However, *FoxO* binds  
443 *TOR*'s promoter and is required for normal *TOR* expression, and GATA motifs are  
444 associated with genes that are not bound by *FoxO* but show *FoxO*-dependent regula-  
445 tion by IIS <sup>49</sup>, suggesting a regulatory circuit from IIS to GATA factors via *FoxO* and  
446 TOR. Given that *FoxO* is not required for the lifespan-extending effects of DR <sup>52</sup> and  
447 that different insulin-like peptides are produced in response to different nutritional  
448 stimuli <sup>53</sup>, we suggest that signals from IIS via *FoxO* may be modified in peripheral  
449 tissues by TOR-modulated GATA activity, which shapes tissue-specific responses to  
450 diet that ultimately modify physiology and longevity (Figure 8).

451

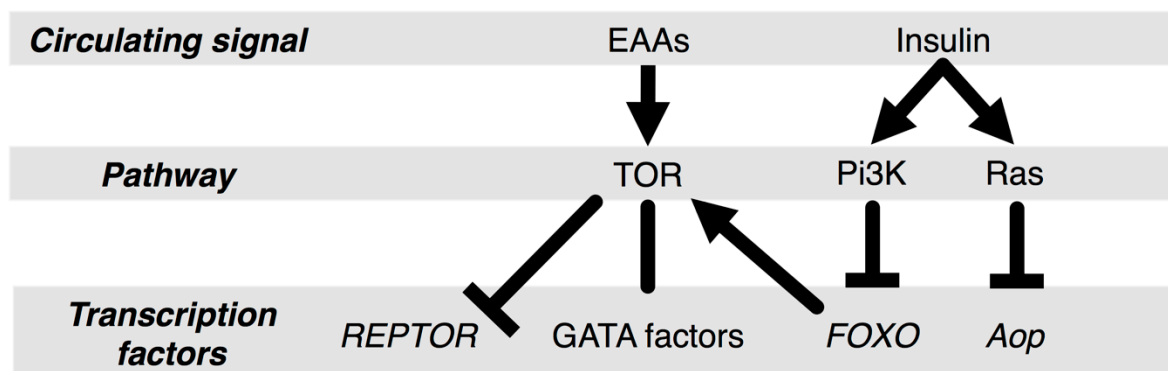

**Figure 8. Predicted molecular integration of GATA factors in nutrient-sensing and lifespan-relevant transcriptional networks in *Drosophila*.** Our transcriptomic analysis associates transcriptional effects of EAA restriction with TOR, and the TOR-dependent EAA regulon with GATA factors. Previous studies have shown that (1) TOR directly represses *REPTOR*, (2) The insulin pathway bifurcates via Pi3K and Ras to regulate lifespan via *FOXO* and *Aop*, and (3) GATA binding sites are associated with genes that are differentially expressed in *FOXO* mutants but not bound by *FOXO*, that *FOXO* both binds *TOR*'s promoter and *TOR* transcription is reduced in *FOXO* mutants. Together, these results suggest that *TOR* integrates signals from IIS/Pi3K signalling via *FOXO*, that regulons of DR, TOR and *FOXO* are all enriched in GATA factor binding sites, and therefore that GATA factors mediate transcriptional effects of both EAAs and *FOXO* via TOR.

452 The gut appears to be a particularly effective target for interventions to extend  
453 lifespan<sup>46</sup>. The adult gut has a critical role in the ongoing health of organisms, bal-  
454 ancing the passage of nutrients whilst resisting environmental stresses<sup>54</sup>. In flies,  
455 there are complex relationships between age, gut maintenance, diet, metabolism,  
456 resident microbiota and expression of antimicrobial genes<sup>55-62</sup>. Recent work sug-  
457 gests a central role for the gut in mediating lifespan extension by DR in female flies,  
458 revealing sexually dimorphic pathologies in aged female guts<sup>63</sup>, dependent on cell-  
459 autonomous expression of sex determination pathways<sup>64</sup>. Failure of gut integrity is  
460 associated with changes in microbiota and greater antimicrobial peptide expression,  
461 and appears to be a marker of imminent death<sup>58,65</sup>. In worms, the GATA factor ELT-2  
462 interacts with p38 transcriptional regulators to modify adult gut immunity<sup>66</sup>, whilst  
463 GATA factors are required for normal gut development and maintenance in *Drosophi-*  
464 *la* and mice<sup>38,67</sup>. It is thus tempting to speculate that increased risk of death in late  
465 life may be precipitated by a loss of gut integrity enhancing exposure to environmental  
466 microbes and toxins. Our results are directly relevant to these issues, because coor-  
467 dination across organs of a transcriptional module (module 4) that was perturbed un-  
468 der long-lived conditions strongly corresponded to *GATAe* expression, and *GATAe*  
469 and paracrine insulin signalling have each been shown to be required for intestinal  
470 stem cell proliferation<sup>38,68</sup>. Our lifespan data are consistent with *GATAe* knockdown  
471 in the gut increasing mortality, but since this effect appears to be stochastic and not  
472 necessarily connected to age, the role of *GATAe* regulation in late-life mortality re-  
473 mains to be established. However, fly lifespan is not necessarily extended by en-  
474 hancing expression of components of the immune system<sup>69</sup>, antibiotic treatment<sup>55</sup> or  
475 genetically reducing gut dysplasia<sup>59</sup>. Thus, although compromised gut integrity is  
476 clearly a marker of frailty in late life, it may not be obligately linked to death.

477 This study reveals how the fly's tissues interact as a system, and how that  
478 system responds to EAA dilution and low TOR. The results showed that the effects of  
479 EAA restriction on transcription are likely mediated by TOR via GATA transcription  
480 factors. Entirely consistent with this prediction, genetic analysis confirmed that the  
481 tissue-specific activity of GATA factors dictate the effect of dietary nutrient balance on  
482 phenotype. Importantly, these experiments also suggest that the costs and benefits  
483 of dietary variation may be mediated by different tissues, and therefore that benefits  
484 may be reaped without fitness tradeoffs by targeting specific tissues. The evolution-  
485 ary conservation of GATA factors, of their connection to regulating amino acid me-

486 tabolism, and of the capacity of TOR to mediate lifespan extension, suggests that  
487 GATA factors may be relevant to ameliorating ageing by DR in a broad range of or-  
488 ganisms, including humans.

489

490

## Materials & methods

491

492 *Drosophila melanogaster* and diets were prepared according to (10). 1SY me-  
493 dium is a dietary restriction (DR: diet-induced longevity) regime that extends lifespan  
494 in wild-type and laboratory-maintained flies<sup>71,72</sup>, containing 100 g/l autolysed yeast  
495 (MP Biomedicals, OH, USA), 50 g/l sucrose (Tate & Lyle, London, UK), 15 g/l agar  
496 (Sigma-Aldrich, Dorset, UK), 30 ml/l nipagin (Chemlink Specialities, Dorset, UK), and  
497 3 ml/l propionic acid (Sigma-Aldrich, Dorset, UK). EAA food comprised 1SY with the  
498 addition of cocktail of EAAs dissolved in pH 4.5 water (final concentrations in fly me-  
499 dia: L-arginine 0.43 g/l, L-histidine 0.21 g/l, L-isoleucine 0.34 g/l, L-leucine 0.48 g/l, L-  
500 lysine 0.52 g/l, L-methionine 0.1 g/l, L-phenylalanine 0.26 g/l, L-threonine 0.37 g/l, L-  
501 tryptophan 0.09 g/l, L-valine 0.4 g/l: all supplied by Sigma). EAA+rapamycin (drug-  
502 induced longevity) food consisted of EAA food with the addition of rapamycin (LC la-  
503 boratories, MA, USA) dissolved in ethanol, to a final concentration of 200 µM in the  
504 diet. For RNAi experiments, RU<sub>486</sub> (Sigma M8046) dissolved in ethanol was added to  
505 1SY or EAA food to a final concentration of 200 µm. Vehicle controls were added to  
506 media as appropriate.

507 Outbred wild-type Dahomey flies bearing the endosymbiont *Wolbachia* were  
508 cultured on a 12:12 light cycle at 25°C and 60% humidity. For RNAi experiments, the  
509 TiGS and S<sub>1</sub>106 drivers and RNAi constructs (UAS-srp<sup>RNAi</sup>: Vienna Stock Center  
510 #33748; UAS-GATAe<sup>TRIP</sup>: Bloomington Stock Center #33748) were backcrossed into  
511 flies bearing the *w* mutation for at least 6 generations (UAS-GATAe<sup>TRIP</sup> was back-  
512 crossed by PCR), and maintained at large population sizes to maintain outbred ge-  
513 netic diversity. For all experiments, parents of experimental flies oviposited onto  
514 grape juice agar for 18h. Eggs were washed from this agar, added to 1SY and cul-  
515 tured to adulthood at standardised density. Newly emerged flies were allowed to ma-  
516 te *ad libitum* for 48h before being lightly anaesthetised with CO<sub>2</sub>. Males were re-  
517 moved, and female flies were allocated to experimental diets. For RNA sequencing,  
518 females were maintained on 1SY, EAA or EAA+rapamycin for six days before dissec-

519 tion. The RNA sequencing experiment was independently replicated three times,  
520 generating three samples per organ or per whole fly, per diet (with the exception of  
521 the gut on 1SY: see Supplementary Text). For egg laying and lifespan experiments,  
522 survival was scored three times per week. Egg laying was scored on day 10 after  
523 eclosion, after 18h egg laying. Fecundity indices were calculated as number of eggs  
524 per female (n=10 females per vial).

525 RNA was collected 6-10h into the flies' light cycle. To prepare RNA for se-  
526 quencing, whole flies were flash-frozen. Brains, abdominal fat bodies, ovaries, guts  
527 and thoraces were micro-dissected in ice-cold RNAlater solution and frozen at -80°C.  
528 RNA was extracted using the QIAGEN total RNA isolation kit and quantified on an  
529 Agilent 2100 bioanalyser. Sequencing was performed by the high throughput ge-  
530 nomics services center at the Huntsman Cancer Institute (University of Utah). Sam-  
531 ple concentration and purity of RNA was measured on a NanoDrop spectrophotome-  
532 ter, and RNA integrity was assessed on an Agilent 2200 TapeStation. Illumina  
533 TruSeq libraries were prepared from this RNA with the Illumina TruSeq Stranded  
534 mRNA Sample Prep kit and sequenced on an Illumina HiSeq2000 101 v3 platform  
535 using paired-end sequencing.

536 Reads were aligned to the *D. melanogaster* genome annotation 5.57 using  
537 TopHat2 2.0.14 and counted using HTSeq 0.5.4p3<sup>73,74</sup>. Non-protein coding genes  
538 were retained. Unmapped reads were discarded. Enumerated reads were then ana-  
539 lysed in R (3.0 & 3.1) using BioConductor. RPKM was calculated from read counts  
540 generated by HTSeq, using the EdgeR library.

541 Differential expression across the three experimental conditions was deter-  
542 mined with a negative binomial GLM fitted by DESeq2 (1.8.1,<sup>75</sup>), without rejection  
543 based on Cook's distance, calculating P-values with a two-sided Wald test, and cal-  
544 culating false discovery rate by Storey's method. Intersections between gene sets  
545 and enriched GO terms were visualised with the upset package in R<sup>76</sup>. GO term en-  
546 richment was analysed using GOrilla (<http://cbl-gorilla.cs.technion.ac.il/>).

547 Unsigned gene coexpression networks were determined using data from all  
548 organs, excluding the whole-fly samples, using the WGCNA package in R<sup>23</sup>. Con-  
549 sensus modules were determined automatically using the *blockwiseConsensusMod-*  
550 *ules* function with default settings and a power of 26, stipulating a minimum module  
551 size of 50 genes. Eigengene determination, variance explained by Eigengenes and  
552 clustering were performed using internal WGCNA functions, as per the package tuto-



553 rial  
554 (<http://labs.genetics.ucla.edu/horvath/CoexpressionNetwork/Rpackages/WGCNA/Tutorials/index.html>). Changes in between-module correlations by experimental condi-  
555 tion were calculated by custom R functions: correlation matrices (Spearman's rho) for  
556 module Eigengenes were calculated in each experimental condition, and changes  
557 were calculated by subtracting the DR matrix and the EAA+rapamycin matrix from  
558 the EAA matrix, to calculate observed changes in correlations between pairs of  
559 Eigengenes under DR and under rapamycin administration, respectively. To generate  
560 null distributions for changes in correlations for each pair of modules in each of the  
561 two long-lived conditions, the same procedure was repeated 10,000 times, permuting  
562 each Eigengene and calculating changes in correlation for each pair. Observed  
563 changes were considered significant when they did not fall between the 2.5<sup>th</sup> and  
564 97.5<sup>th</sup> percentiles of their respective null distribution.

566 The most likely acyclic network between modules was determined by Additive  
567 Bayesian Network analysis of module Eigengenes using the R package ABN with  
568 10000 iterations. This approach determines the likelihood of inter-dependencies be-  
569 tween variables by randomly simulating data and comparing to the observed inter-  
570 dependencies. ABN found a consensus structure to the data after only ~1000 itera-  
571 tions, indicating that the structure is robust to further simulation. The ABN was plotted  
572 in Cytoscape, using hierarchical network ordering. Meta-module analysis and  
573 Eigengene perturbation analysis were performed according to <sup>25</sup>.

574 Enrichment of cis-regulatory motifs was analysed using i-Cis target <sup>77</sup>, exclud-  
575 ing genes for which DEseq2 models did not converge. Unannotated CRMs were ex-  
576 cluded from further analysis. Samples were hierarchically clustered according to the  
577 presence/absence of transcription factor binding sites with the R hclust function, us-  
578 ing a binary distance metric. Notches on boxplots, approximating 95% confidence  
579 intervals of medians were produced using the "notch" argument to the R boxplot  
580 function. Heatmaps of TF:gene-set associations were plotted using the heatmap.2  
581 function from the R gplots package, and ordered by heirarchical clustering using bi-  
582 nary distance.

583 Analysis of evolutionary conservation of the association between TF binding  
584 motifs and differentially expressed genes was conducted per tissue. Groups of differ-  
585 entially expressed genes (according to DEseq2 analysis) showing the same signs of  
586 fold-change in response to EAA restriction were scanned for significantly over-



587 represented motifs in their promoter regions. 706 motifs were included in the search,  
588 from OnTheFly (2014 release), flyreg v2, dmmpmm2009 and idmmpmm2009 data-  
589 bases, all provided by MEME 4.10 (<http://meme-suite.org>). Pscan version 1.2.2 was  
590 used to score the motifs for the gene list, using the sets of genes that either didn't  
591 show any diet-induced differential expression in any tissue, or were not expressed,  
592 as a 'null hypothesis' background. For each gene list, the 706 scores (one per motif)  
593 produced by pscan were normalized to z scores, and *P* values were computed, cor-  
594 rected for multiple testing (Benjamini-Hochberg).

595 The same procedure was repeated for the evolutionarily conserved regulation  
596 analysis, except that the genes considered were obtained from the 12 *Drosophila*  
597 species (*D.melanogaster* and *D.ananassae*, *D.erecta*, *D.grimshawi*, *D.mojavensis*,  
598 *D.persimilis*, *D.pseudoobscura*, *D.sechellia*, *D.simulans*, *D.virilis*, *D.willistoni* &  
599 *D.yakuba*) whose genomic sequences are part of FlyBase, taking only 1:1 orthologs  
600 of genes which DESeq2 analysis had shown to be differentially expressed in *D. mel-*  
601 *anogaster*. Gene selection was done in two steps: for all gene groupings (differential  
602 expression and background), genes for which OrthoDB version 7 didn't predict a one-  
603 to-one ortholog in all other 11 species were removed. Then, each grouping was ex-  
604 panded with all the relevant orthologs predicted by OrthoDB, such that each gene  
605 group contained 12 times as many genes as after the first step.

606 Survival data were analysed in Microsoft Excel for log-rank statistics, or in R  
607 for Cox Proportional Hazards analysis, using the CoxPH function from the Survival  
608 package. Fecundity indices were analysed with ANOVAs fitted with the lm function in  
609 R.

610

## 611 Bibliography

- 612 1. Niccoli T, Partridge L. Ageing as a risk factor for disease. *Curr Biol.* **22**, R741–  
613 752 (2012)
- 614 2. Piper MD, Partridge L, Raubenheimer D, Simpson SJ. Dietary Restriction and  
615 Aging: A Unifying Perspective. *Cell Metab.* **14** **PAGE**(2011).
- 616 3. McCay CM, Crowell MF, Marnard LA. The effect of retarded growth upon the  
617 length of life span and upon the ultimate body size. *J Nutr.* **10**, 63-59 (1935).
- 618 4. Mair W, Piper MD, Partridge L. Calories Do Not Explain Extension of Life Span  
619 by Dietary Restriction in *Drosophila*. *PLoS Bio.* **3**, e223 (2005).

- 620 5. Lee K, Simpson SJ, Clissold FJ, Brooks R, Ballard WJ, Taylor PW, et al.  
621 Lifespan and reproduction in *Drosophila*: New insights from nutritional geome-  
622 try. *Proc Natl Acad Sci.* **7**, 2498–2503 (2008).
- 623 6. Skorupa DA, Dervisefendic A, Zwiener J, Pletcher SD. Dietary composition  
624 specifies consumption, obesity, and lifespan in *Drosophila melanogaster*. *Ag-*  
625 *ing Cell* **7**, 478–490 (2008).
- 626 7. Grandison RC, Piper MD, Partridge L. Amino-acid imbalance explains exten-  
627 sion of lifespan by dietary restriction in *Drosophila*. *Nature* **462**, 1061–1064  
628 (2009)
- 629 8. Solon-Biet SM, Aisling CM, Ballard WJ, Ruohonen K, Wu LE, Cogger VC, et  
630 al. The Ratio of Macronutrients, Not Caloric Intake, Dictates Cardiometabolic  
631 Health, Aging, and Longevity in Ad Libitum-Fed Mice. *Cell Metab.* **19**, 418–430  
632 (2014).
- 633 9. Solon-Biet SM, Mitchell SJ, Coogan SC, Cogger VC, Gokarn R, C M Aisling, et  
634 al. Dietary Protein to Carbohydrate Ratio and Caloric Restriction: Comparing  
635 Metabolic Outcomes in Mice. *Cell Reports* **11**, 1529-1534 (2015).
- 636 10. Emran S, Yang M, He X, Zandveld J, Piper MD. Target of rapamycin signalling  
637 mediates the lifespan-extending effects of dietary restriction by essential ami-  
638 no acid alteration. *Aging (Albany)* **6**, 390–8 (2014).
- 639 11. Simpson SJ, Couteur DG, Raubenheimer D. Putting the Balance Back in Diet.  
640 *Cell* **161**, 1823 (2015).
- 641 12. Bar-Peled L, Sabatini D. Regulation of mTORC1 by amino acids. *Trends Cell*  
642 *Biol.* **24**, 400-406 (2014)
- 643 13. Taylor RC, Dillin A. XBP-1 is a cell-nonautonomous regulator of stress re-  
644 sistance and longevity. *Cell* **153**, 1435–1447 (2013).
- 645 14. Katewa S, Kapahi P. Role of TOR signaling in aging and related biological  
646 processes in *Drosophila melanogaster*. *Exp Gerontol.* **46**, 382-390 (2011).
- 647 15. Vilchez D, Simic M, Dillin A. Proteostasis and aging of stem cells. *Trends Cell*  
648 *Biol.* **24**, 161-171 (2014).
- 649 16. Bülow MH, Aebersold R, Pankratz MJ, Jünger MA. The *Drosophila* FoxA  
650 Ortholog Fork Head Regulates Growth and Gene Expression Downstream of  
651 Target of Rapamycin. *PLoS ONE* **5**, e15171 (2010).
- 652 17. Robida-Stubbs S, Glover-Cutter K, Lamming D, Mizunuma M, Narasimhan S,  
653 Neumann-Haefelin E, et al. TOR signaling and rapamycin influence longevity  
654 by regulating SKN-1/Nrf and DAF-16/FoxO. *Cell Metab.* **15**, 713-724 (2012).
- 655 18. Tiebe M, Lutz M, Garza A, Buechling T, Boutros M, Telean AA. REPTOR  
656 and REPTOR-BP Regulate Organismal Metabolism and Transcription Down-  
657 stream of TORC1. *Dev Cell.* **33**, 272–84 (2015).

- 658 19. Alic N, Tullet JM, Niccoli T, Broughton S, Hoddinott MP, Slack C, et al. Cell-  
659 nonautonomous effects of dFOXO/DAF-16 in aging. *Cell Rep.* **6**, 608–616  
660 (2014).
- 661 20. Zhang P, Judy M, Lee S-J, Kenyon C. Direct and Indirect Gene Regulation by  
662 a Life-Extending FOXO Protein in *C. elegans*: Roles for GATA Factors and Li-  
663 pid Gene Regulators. *Cell Metab.* **17**, 85–100 (2013).
- 664 21. Potier D, Davie K, Hulselmans G, Sanchez M, Haagen L, Vãn H-T, et al. Map-  
665 ping Gene Regulatory Networks in *Drosophila* Eye Development by Large-  
666 Scale Transcriptome Perturbations and Motif Inference. *Cell Reports* **9**, 2290-  
667 2303 (2014).
- 668 22. Dutta D, Dobson AJ, Houtz PL, Gläßer C, Revah J, Korzelius J, et al. Regional  
669 Cell-Specific Transcriptome Mapping Reveals Regulatory Complexity in the  
670 Adult *Drosophila* Midgut. *Cell Reports* **12**, 346–358 (2015).
- 671 23. Langfelder P, Horvath S. WGCNA: an R package for weighted correlation net-  
672 work analysis. *BMC Bioinformatics.* **9**, 559-PAGE (2008).
- 673 24. McCormick M, Promislow D. Networks in the Biology of Aging: Powerful Tools  
674 for a Complex Process. *Annu Rev Gerontol Geriat.* **34**, 243-266 (2014).
- 675 25. Langfelder P, Horvath S. Eigengene networks for studying the relationships  
676 between co-expression modules. *Bmc Syst Biol.* **1**, 54 PAGE (2007).
- 677 26. Moore A, Jan L, Jan Y. Hamlet, a binary genetic switch between single-and  
678 multiple-dendrite neuron morphology. *Science.* **297**, 1355-1358 (2002).
- 679 27. Moore AW, Roegiers F, Jan LY, Jan Y-NN. Conversion of neurons and glia to  
680 external-cell fates in the external sensory organs of *Drosophila* hamlet mutants  
681 by a cousin-cousin cell-type respecification. *Genes Dev.* **18**, 623–628 (2004).
- 682 28. Cooper T. Transmitting the signal of excess nitrogen in *Saccharomyces cere-*  
683 *visiae* from the Tor proteins to the GATA factors: connecting the dots. *FEMS*  
684 *Microbiol Rev.* **26**, 223-238 (2002).
- 685 29. Attardo GM, Higgs S, Klingler KA, Vanlandingham DL, Raikhel AS. RNA inter-  
686 ference-mediated knockdown of a GATA factor reveals a link to anautogeny in  
687 the mosquito *Aedes aegypti*. *Proc Natl Acad Sci.* **100**, 13374–13379 (2003).
- 688 30. Lossky M, Wensink P. Regulation of *Drosophila* yolk protein genes by an ova-  
689 ry-specific GATA factor. *Mol Cell Biol.* **15**, 6943–6952 (1995).
- 690 31. Alic N, Giannakou ME, Papatheodorou I, Hoddinott MP, Andrews DT, Bo-  
691 lukbasi E, et al. Interplay of dFOXO and Two ETS-Family Transcription Fac-  
692 tors Determines Lifespan in *Drosophila melanogaster*. *Plos Genet.* **10**,  
693 e1004619 (2014).
- 694 32. Giannakou ME, Goss M, Jünger MA, Hafen E, Leever SJ, Partridge L. Long-  
695 Lived *Drosophila* with Overexpressed dFOXO in Adult Fat Body. *Science* **305**,  
696 361 PAGE (2004).

- 697 33. Poirier L, Shane A, Zheng J, Seroude L. Characterization of the *Drosophila*  
698 gene-switch system in aging studies: a cautionary tale. *Aging Cell*. **7**, 758–770  
699 (2008).
- 700 34. Couteur DG, Samantha S-B, Cogger VC, Mitchell SJ, Senior A, de Cabo R, et  
701 al. The impact of low-protein high-carbohydrate diets on aging and lifespan.  
702 *Cell Mol Life Sci* **73**, 1237–1252 (2016).
- 703 35. Sorrentino RP, Gajewski KM, Schulz RA. GATA factors in *Drosophila* heart  
704 and blood cell development. *Semin Cell Dev Biol*. **16**, 107–116 (2005).
- 705 36. Sam S, Leise W, Hoshizaki D. The serpent gene is necessary for progression  
706 through the early stages of fat-body development. *Mech Dev*. **60**, 197–205  
707 (1996).
- 708 37. Murakami R, Okumura T, Uchiyama H. GATA factors as key regulatory mole-  
709 cules in the development of *Drosophila* endoderm. *Dev Growth Differ*. **47**,  
710 581–589 (2005).
- 711 38. Buchon N, Osman D, David F, Fang H, Boquete J-P, Deplancke B, et al. Mor-  
712 phological and Molecular Characterization of Adult Midgut Compartmentaliza-  
713 tion in *Drosophila*. *Cell Reports* **3**, 1725-1738 (2013).
- 714 39. Okumura T, Takeda K, Kuchiki M, Akaishi M. GATAe regulates intestinal stem  
715 cell maintenance and differentiation in *Drosophila* adult midgut. *Dev Biol*. **410**,  
716 24-35 (2016).
- 717 40. Hansen IA, Attardo GM, Park J-H, Peng Q, Raikhel AS. Target of rapamycin-  
718 mediated amino acid signaling in mosquito anautogeny. *Proc Natl Acad Sci*.  
719 **101**, 10626–10631 (2004).
- 720 41. Hansen IA, Attardo GM, Roy SG, Raikhel AS. Target of Rapamycin-dependent  
721 Activation of S6 Kinase Is a Central Step in the Transduction of Nutritional  
722 Signals during Egg Development in a Mosquito. *J Biol Chem*. **280**, 20565–  
723 20572 (2005).
- 724 42. Park J-H, Attardo GM, Hansen IA, Raikhel AS. GATA Factor Translation Is the  
725 Final Downstream Step in the Amino Acid/Target-of-Rapamycin-mediated Vi-  
726 tellogenin Gene Expression in the Anautogenous Mosquito *Aedes aegypti*. *J*.  
727 *Biol. Chem*. **281**, 11167–11176 (2006).
- 728 43. Martín D, Piulachs M, Raikhel A. A novel GATA factor transcriptionally re-  
729 presses yolk protein precursor genes in the mosquito *Aedes aegypti* via inter-  
730 action with the CtBP corepressor. *Mol Cell Biol*. **21**, 164–174 (2001).
- 731 44. Williams GC. Pleiotropy, natural selection, and the evolution of senescence.  
732 *Evolution* **11**, 398–411 (1957).
- 733 45. Rera M, Azizi M, Walker D. Organ-specific mediation of lifespan extension:  
734 More than a gut feeling? *Ageing Res Rev* **12**, 436–444 (2013).

- 735 46. Budovskaya YV, Wu K, Southworth LK, Jiang M, Tedesco P, Johnson TE, et  
736 al. An elt-3/elt-5/elt-6 GATA Transcription Circuit Guides Aging in *C. elegans*.  
737 *Cell.*, **134**, 1–13 (2007).
- 738 47. Murphy CT, A M Steven, Bargmann CI, Fraser A, Kamath RS, Ahringer J, et  
739 al. Genes that act downstream of DAF-16 to influence the lifespan of *Caeno-*  
740 *rhabditis elegans*. *Nature.* **424**, 277–284 (2003).
- 741 48. Alic N, Andrews DT, Giannakou ME, Papatheodorou I, Slack C, Hoddinott MP,  
742 et al. Genome wide dFOXO targets and topology of the transcriptomic re-  
743 sponse to stress and insulin signalling. *Mol Syst Biol.* **7**, 502 PAGE (2011).
- 744 49. Teleman AA. miR-200 De-FOGs Insulin Signaling. *Cell Metab.* **11**, 8–9 (2010).
- 745 50. Slack C, Giannakou ME, Foley A, Goss M, Partridge L. dFOXO-independent  
746 effects of reduced insulin-like signaling in *Drosophila*. *Aging Cell* **10**, 735–748  
747 (2011).
- 748 51. Min K, Yamamoto R, Buch S, Pankratz M, Tatar M. *Drosophila* lifespan control  
749 by dietary restriction independent of insulin-like signaling. *Aging Cell.* **7**, 199-  
750 206 (2008).
- 751 52. Kim J, Neufeld T. Dietary sugar promotes systemic TOR activation in *Dro-*  
752 *sophila* through AKH-dependent selective secretion of Dilp3. *Nat Comms* **6**,  
753 6846 PAGE (2015).
- 754 53. Buchon N, Osman D. All for one and one for all: Regionalization of the *Dro-*  
755 *sophila* intestine. *Insect Biochem Mol Biol.* **67**:2-8 (2015).
- 756 54. Ren C, Webster P, Finkel SE, Tower J. Increased internal and external bacte-  
757 rial load during *Drosophila* aging without life-span trade-off. *JOURNAL* **6**, 144–  
758 152 (2007).
- 759 55. Biteau B, Karpac J, Supoyo S, Matthew D, Lehmann R, Jasper H. Lifespan  
760 Extension by Preserving Proliferative Homeostasis in *Drosophila*. *PLoS Genet.*  
761 **6**, e1001159 (2010).
- 762 56. Rera M, Bahadorani S, Cho J, Koehler C, Ulgherait M. Modulation of longevity  
763 and tissue homeostasis by the *Drosophila* PGC-1 homolog. *Cell Metab.* **14**,  
764 623–634 (2011).
- 765 57. Rera M, Clark R, Walker D. Intestinal barrier dysfunction links metabolic and  
766 inflammatory markers of aging to death in *Drosophila*. *Proc Natl Acad Sci.*  
767 **109**, 21528–21533 (2012).
- 768 58. Ayyaz A, Li H, Jasper H. Haemocytes control stem cell activity in the *Dro-*  
769 *sophila* intestine. *Nat Cell Biol.* **17**, 736–748 (2015).
- 770 59. Carlson K, Gardner K, Pashaj A, Carlson D. Genome-wide gene expression in  
771 relation to Age in large laboratory cohorts of *Drosophila melanogaster*. *Genet*  
772 *Res Int*, 835624 (2015)



- 773 60. Petkau K, Parsons B, Duggal A, Foley E. A deregulated intestinal cell cycle  
774 program disrupts tissue homeostasis without affecting longevity in *Drosophila*.  
775 *J Biol Chem.* **289**, 28719-28729 (2014).
- 776 61. Wong A, Dobson AJ, Douglas AE. Gut microbiota dictates the metabolic re-  
777 sponse of *Drosophila* to diet. *J Exp Biol.* **217**, 1894–1901 (2014).
- 778 62. Regan JC, Khericha M, Dobson AJ, Bolukbasi E, Rattanavirotkul N, Partridge  
779 L. Sex difference in pathology of the ageing gut mediates the greater response  
780 of female lifespan to dietary restriction. *Elife.* **5**, e10956 (2016).
- 781 63. Hudry B, Khadayate S, Miguel-Aliaga I. The sexual identity of adult intestinal  
782 stem cells controls organ size and plasticity. *Nature* **530**, 344–348 (2016).
- 783 64. Clark RI, Salazar A, Yamada R, Sorel F-G, Morselli M, Alcaraz J, et al. Distinct  
784 Shifts in Microbiota Composition during *Drosophila* Aging Impair Intestinal  
785 Function and Drive Mortality. *Cell Rep.* **12**, 1656-1667 (2015).
- 786 65. Block DH, Kwame T-B, Kang H, Carlisle JA, Hanganu A, Lai T, et al. The De-  
787 velopmental Intestinal Regulator ELT-2 Controls p38-Dependent Immune Re-  
788 sponses in Adult *C. elegans*. *PLoS Genet.* **11**, e1005265 (2015).
- 789 66. Aronson BE, Stapleton KA, Krasinski SD. Role of GATA factors in develop-  
790 ment, differentiation, and homeostasis of the small intestinal epithelium. *Am J*  
791 *Physiol Gastrointest Liver Physiol.* **306**, 474–490 (2014).
- 792 67. O'Brien LE, Soliman SS, Li X, Bilder D. Altered Modes of Stem Cell Division  
793 Drive Adaptive Intestinal Growth. *Cell* **147**, 603–614 (2011).
- 794 68. Libert S, Chao Y, Chu X, Pletcher SD. Trade-offs between longevity and path-  
795 ogen resistance in *Drosophila melanogaster* are mediated by NFκB signaling.  
796 *Aging Cell* **5**, 533–43 (2006).
- 797 69. Bass T, Grandison RC, Wong R, Martinez P, Partridge L, Piper MDW. Optimi-  
798 zation of dietary restriction protocols in *Drosophila*. *J Gerontol A Biol Sci Med*  
799 *Sci* **62**, 1071-1081 (2007).
- 800 70. Metaxakis A, Partridge L. Dietary Restriction Extends Lifespan in Wild-Derived  
801 Populations of *Drosophila melanogaster*. *PLoS ONE* **8**, e74681 (2013).
- 802 71. Kim D, Perteau G, Trapnell C, Pimentel H, Kelley R, Salzberg SL. TopHat2: ac-  
803 curate alignment of transcriptomes in the presence of insertions, deletions and  
804 gene fusions. *Genome Biol* **14**, R36 PAGE (2013).
- 805 72. Anders S, J M Davis, Chen Y, Okoniewski M, Smyth GK, Huber W, et al.  
806 Count-based differential expression analysis of RNA sequencing data using R  
807 and Bioconductor. *Nat Protoc.* **8**, 1765–1786 (2013).
- 808 73. Love MI, Huber W, Anders S. Moderated estimation of fold change and dis-  
809 persion for RNA-seq data with DESeq2. **JOURNAL 15 550 PAGE** (2014).

810 74. Lex A, Gehlenborg N, Strobel H. UpSet: visualization of intersecting sets.  
811 *IEEE Trans Vis Comput Graph* **20**, 1983-1992 (2014).

812 75. Herrmann C, de Sande B, Potier D, Aerts S. i-cisTarget: an integrative ge-  
813 nomics method for the prediction of regulatory features and cis-regulatory  
814 modules. *JOURNAL* **40**, e114–e114 THIS ISN'T RIGHT (2012).

815

816

## Acknowledgments

817 We thank Cathy Slack, Nazif Alic, Angela Douglas and Virginia Howick for comments  
818 which improved the manuscript. This study was funded by grants to MP from the Bio-  
819 technology and Biological Sciences Research Council (BBI011544/1) and the Royal  
820 Society (UF100158 & RG110303).

821

822

## Authors' Contributions

823 AJD analysed data, performed experiments, designed the study and wrote the manu-  
824 script. XH performed experiments. E Blanc analysed data. E Bolukbasi contributed  
825 transgenic flies and performed experiments. YF performed experiments. MY per-  
826 formed experiments and designed the study. MDWP designed the study and wrote  
827 the paper.

828

## Competing financial interests

829 The authors declare they have no competing financial interests.

830

831

## Data availability

832 RNAseq data have been deposited with NCBI. Custom R scripts have been uploaded  
833 to GitHub.
